# Supplementary material for: Geomicrobiology of a seawater-influenced active sulfuric acid cave
Source: PLoS One. 2019 Aug 8;14(8):e0220706. doi: 10.1371/journal.pone.0220706 (PMC6687129; doi:10.1371/journal.pone.0220706)
Supplement: S1 Appendix — (XLSX) [file pone.0220706.s014.xlsx]

## Sheet: Foglio1
Domain	Phlyum	Class	Order	Family	Genus	F-stream-1	F-stream-2	F-float-1	F-float-2	F-sed-1	F-sed-2	V-brown-1	V-brown-2	V-grey-1	V-grey-2	M-1	M-2
Archaea	Aenigmarchaeota	Deep Sea Euryarchaeotic Group(DSEG)	uncultured archaeon	Unclassified	Unclassified	0	0	0	0	0	0.0443745	0	0	0.311151	0	0	0
Archaea	Altiarchaeales	uncultured archaeon	Unclassified	Unclassified	Unclassified	0	0	0.134173	0.175039	0.0383411	0.0806809	0	0	0	0	0	0
Archaea	Ancient Archaeal Group(AAG)	uncultured archaeon	Unclassified	Unclassified	Unclassified	0	0	0	0	0	0.0766469	0	0	0	0	0	0
Archaea	Diapherotrites	Diapherotrites Incertae Sedis	Unknown Order	Unknown Family	Candidatus Iainarchaeum	0	0	0	0	0.102243	0	0	0	0	0	0	0
Archaea	Euryarchaeota	Halobacteria	Halobacteriales	Halobacteriaceae	Halobacterium	0	0	0	0	0	0	0.0204645	0	0	0	0	0.107267
Archaea	Euryarchaeota	Thermoplasmata	Thermoplasmatales	AMOS1A-4113-D04	uncultured archaeon	0	0	0	0	0	0.0524426	0	0	0	0	0	0
Archaea	Euryarchaeota	Thermoplasmata	Thermoplasmatales	CCA47	Unclassified	0	0	0	0	0.0511215	0.1896	0	0	0	0	0	0
Archaea	Euryarchaeota	Thermoplasmata	Thermoplasmatales	Ferroplasmaceae	Ferroplasma	0	0	0	0	0	0	0	0	0	0	0	2.25261
Archaea	Euryarchaeota	Thermoplasmata	Thermoplasmatales	Ferroplasmaceae	uncultured	0	0	0	0	0	0	0	0	0	0	0	1.98445
Archaea	Euryarchaeota	Thermoplasmata	Thermoplasmatales	Marine Benthic Group D and DHVEG-1	Unclassified	0	0	0.464444	0	0	0.346928	0	0	0	0	0	0
Archaea	Euryarchaeota	Thermoplasmata	Thermoplasmatales	Marine Benthic Group D and DHVEG-1	uncultured Thermoplasmatales archaeon	0	0	0	0	0	0.3792	0	0	0	0	0	0
Archaea	Euryarchaeota	Thermoplasmata	Thermoplasmatales	Thermoplasmataceae	Thermoplasma	0	0	0	0	0	0	0	0	0	0	66.915	57.0931
Archaea	Euryarchaeota	Thermoplasmata	Thermoplasmatales	VC2.1 Arc6	uncultured archaeon	0	0	0	0	0	0.213805	0	0	0	0	0	0
Archaea	Lokiarchaeota	Ambiguous_taxa	Unclassified	Unclassified	Unclassified	0	0	0	0.140032	0	0	0	0	0	0	0	0
Archaea	Lokiarchaeota	Unclassified	Unclassified	Unclassified	Unclassified	0	0	0.412839	0	0	0	0	0	0	0	0	0
Archaea	Lokiarchaeota	uncultured archaeon	Unclassified	Unclassified	Unclassified	0	0	0	0	0	0.520392	0	0	0	0	0	0
Archaea	Marine Hydrothermal Vent Group(MHVG)	uncultured archaeon	Unclassified	Unclassified	Unclassified	0	0	0	0	0	0.161362	0	0	0	0	0	0
Archaea	Miscellaneous Euryarchaeotic Group(MEG)	Unclassified	Unclassified	Unclassified	Unclassified	0	0	0	0	0.0830724	0	0	0	0	0	0	0
Archaea	Miscellaneous Euryarchaeotic Group(MEG)	uncultured euryarchaeote	Unclassified	Unclassified	Unclassified	0	0	0	0	0	0.0322724	0	0	0	0	0	0
Archaea	Thaumarchaeota	AK31	uncultured archaeon	Unclassified	Unclassified	0	0	0	0	0	0	0	0	0.170631	0	0	0
Archaea	Thaumarchaeota	Marine Group I	Ambiguous_taxa	Ambiguous_taxa	Ambiguous_taxa	0.06113	0	0	0	0	0	0	0	0	0	0	0
Archaea	Thaumarchaeota	Marine Group I	Unclassified	Unclassified	Unclassified	1.2226	0.156544	0	0	0	0	0.3172	0.951029	0.933454	0	0	0
Archaea	Thaumarchaeota	Marine Group I	uncultured bacterium	Unclassified	Unclassified	0	0	0	0	0	0	0	0.688432	0	0	0	0
Archaea	Thaumarchaeota	Marine Group I	Unknown Order	Unknown Family	Unclassified	0	0	0	0	0	0	0	0	0.235873	0	0	0
Archaea	Thaumarchaeota	Soil Crenarchaeotic Group(SCG)	Unclassified	Unclassified	Unclassified	0	0	0	0	0	0	0	0	0	1.88367	0	0
Archaea	Thaumarchaeota	South African Gold Mine Gp 1(SAGMCG-1)	Unknown Order	Unknown Family	Candidatus Nitrosotalea	0	0	0	0	0	0	0	0.397445	0	0	0	0
Archaea	Thaumarchaeota	Unclassified	Unclassified	Unclassified	Unclassified	0	0	0	0	0	0	0	0.745209	0.968584	0	0	0
Archaea	Unclassified	Unclassified	Unclassified	Unclassified	Unclassified	0	0	0	0	0	0	0	0	0.441634	0	0	0
Archaea	uncultured archaeon	Unclassified	Unclassified	Unclassified	Unclassified	0	0	0.113531	0	0.0383411	0.714026	0	0	0	0	0	0
Archaea	Woesearchaeota (DHVEG-6)	Euryarchaeota archaeon SCGC AAA286-E23	Unclassified	Unclassified	Unclassified	0	0	0	0.0525118	0	0.0564767	0	0	0	0	0	0
Archaea	Woesearchaeota (DHVEG-6)	Unclassified	Unclassified	Unclassified	Unclassified	0.0873286	0.0187852	2.65249	3.39576	0.453703	0.99641	0	0.248403	1.32992	0	0	0
Archaea	Woesearchaeota (DHVEG-6)	uncultured archaeon	Unclassified	Unclassified	Unclassified	0	0	0.691506	0.70891	0.0830724	0.262213	0	0	0	0	0	0
Archaea	Woesearchaeota (DHVEG-6)	uncultured archaeon CLEAR-24	Unclassified	Unclassified	Unclassified	0	0	0	0	0	0.1896	0	0	0	0	0	0
Archaea	Woesearchaeota (DHVEG-6)	uncultured bacterium	Unclassified	Unclassified	Unclassified	0	0	0	0.638894	0	0.0968171	0	0.191625	0.311151	0	0	0
Archaea	Woesearchaeota (DHVEG-6)	uncultured crenarchaeote	Unclassified	Unclassified	Unclassified	0	0	0.670864	1.16401	0	0.205736	0	0	0	0	0	0
Archaea	Woesearchaeota (DHVEG-6)	uncultured euryarchaeote	Unclassified	Unclassified	Unclassified	0	0	0.0412839	0	0	0	0	0.0283889	0	0	0	0
Archaea	Woesearchaeota (DHVEG-6)	unidentified archaeon	Unclassified	Unclassified	Unclassified	0	0	0.361234	0	0	0	0	0	0	0	0	0
Bacteria	AC1	uncultured sediment bacterium	Unclassified	Unclassified	Unclassified	0	0	0	0	0.0575117	0	0	0	0	0	0	0
Bacteria	Acetothermia	uncultured bacterium	Unclassified	Unclassified	Unclassified	0	0	0.123852	0	0	0	0	0	0	0	0	0
Bacteria	Acetothermia	uncultured bacterium GR-296.II.45	Unclassified	Unclassified	Unclassified	0	0	0	0	0	0.0564767	0	0.0709723	0	0	0	0
Bacteria	Acetothermia	Unknown Class	Unknown Order	Unknown Family	Candidatus Acetothermus	0	0	0	0	0	0.0726129	0	0	0	0	0	0
Bacteria	Acidobacteria	Acidobacteria	Acidobacteriales	Acidobacteriaceae (Subgroup 1)	Acidobacterium	0	0	0	0	0	0	0.439988	0	0.481783	0	0	0
Bacteria	Acidobacteria	Acidobacteria	Acidobacteriales	Acidobacteriaceae (Subgroup 1)	Unclassified	0	0	0	0	0	0	0	0.454223	0	0	0	0
Bacteria	Acidobacteria	Acidobacteria	Acidobacteriales	Acidobacteriaceae (Subgroup 1)	uncultured	0	0	0	0	0	0	0	0	0.301114	0.279062	0	0
Bacteria	Acidobacteria	Blastocatellia	Blastocatellales	Blastocatellaceae (Subgroup 4)	45597	0	0	0	0	0	0	0	0.830376	0.28104	0.218017	0	0
Bacteria	Acidobacteria	Blastocatellia	Blastocatellales	Blastocatellaceae (Subgroup 4)	Blastocatella	1.38853	1.02066	0	0	0	0	0	0	0	1.16857	0	0
Bacteria	Acidobacteria	Blastocatellia	Blastocatellales	Blastocatellaceae (Subgroup 4)	DS-100	0	0	0	0	0	0	0	0.496806	0.682525	0.697654	0	0
Bacteria	Acidobacteria	Blastocatellia	Blastocatellales	Blastocatellaceae (Subgroup 4)	RB41	0	0	0	0	0	0	0.511614	0	0.501857	0	0	0
Bacteria	Acidobacteria	Blastocatellia	Blastocatellales	Blastocatellaceae (Subgroup 4)	Unclassified	0	0	0	0	0	0	1.79065	0.425834	0.371374	0	0	0
Bacteria	Acidobacteria	Blastocatellia	Blastocatellales	Blastocatellaceae (Subgroup 4)	uncultured	0	0	0	0	0.0127804	0	0	0	0.506875	0.723816	0	0
Bacteria	Acidobacteria	Holophagae	Acanthopleuribacterales	Acanthopleuribacteraceae	Acanthopleuribacter	0	0.319349	0	0	0	0.233975	0	0	0	0	0	0
Bacteria	Acidobacteria	Holophagae	Holophagales	Holophagaceae	Geothrix	0	0	0	0	0	0	1.46321	0	0	0	0	0
Bacteria	Acidobacteria	Holophagae	Subgroup 10	CA002	Unclassified	0.85582	1.9975	0	0	0	0	0	0	0	0	0	0
Bacteria	Acidobacteria	Holophagae	Subgroup 10	CA002	uncultured bacterium	0.270719	0	0	0	0	0.165396	0	0.106458	0	0	0	0
Bacteria	Acidobacteria	Holophagae	Subgroup 10	Sva0725	Unclassified	1.51952	0.726362	0	0	0	0	0	0	0	0	0	0
Bacteria	Acidobacteria	Holophagae	Subgroup 10	Sva0725	uncultured Acidobacteria bacterium	0.497773	0	0	0	0	0.177498	0	0	0	0	0	0
Bacteria	Acidobacteria	Holophagae	Subgroup 10	Sva0725	uncultured bacterium	0.820889	0.156544	0	0	0	0	0	0	0	0	0	0
Bacteria	Acidobacteria	Holophagae	Subgroup 10	Unclassified	Unclassified	0	0.306825	0	0	0	0	0	0	0	0	0	0
Bacteria	Acidobacteria	Holophagae	Subgroup 23	Unclassified	Unclassified	0.209589	0	0	0	0.523995	0.427609	0	0	0	0	0	0
Bacteria	Acidobacteria	Holophagae	Subgroup 23	uncultured Acidobacteria bacterium	Unclassified	0	0	0	0.13128	0	0	0	0	0	0	0	0
Bacteria	Acidobacteria	Holophagae	Subgroup 23	uncultured bacterium	Unclassified	0	0	1.87842	0	0	0.427609	0	0	0	0	0	0
Bacteria	Acidobacteria	Holophagae	Subgroup 7	Unclassified	Unclassified	0	0	0	0	0	0	1.14601	0.71682	0	0.741258	0	0
Bacteria	Acidobacteria	Holophagae	Subgroup 7	uncultured bacterium	Unclassified	0	0	0	0	0	0	0	0	0.100371	0.322665	0	0
Bacteria	Acidobacteria	Solibacteres	Solibacterales	Solibacteraceae (Subgroup 3)	Bryobacter	0	0.118973	0	0	0	0	0	0	0	0	0	0
Bacteria	Acidobacteria	Solibacteres	Solibacterales	Solibacteraceae (Subgroup 3)	Candidatus Solibacter	0	0	0	0	0	0	0	0.752307	0	0.76742	0	0
Bacteria	Acidobacteria	Solibacteres	Solibacterales	Solibacteraceae (Subgroup 3)	Elev-16S-1166	0	0	0	0	0	0	1.01299	0.468417	0.110409	0.584285	0	0
Bacteria	Acidobacteria	Solibacteres	Solibacterales	Solibacteraceae (Subgroup 3)	PAUC26f	0.288184	0.319349	0	0	0	0	0.613936	0	0.3513	0	0	0
Bacteria	Acidobacteria	Solibacteres	Solibacterales	Solibacteraceae (Subgroup 3)	Unclassified	0	0	0.350913	0.332575	0.146974	0	0	0	0.17565	0	0	0
Bacteria	Acidobacteria	Subgroup 11	uncultured bacterium	Unclassified	Unclassified	0	0	0	0	0	0	0	0	0.250928	0	0	0
Bacteria	Acidobacteria	Subgroup 13	uncultured bacterium	Unclassified	Unclassified	0	0	0	0	0	0	0	0.596167	0	0	0	0
Bacteria	Acidobacteria	Subgroup 17	Unclassified	Unclassified	Unclassified	0.12226	0	0	0	0	0	0.0920905	0	0	0	0	0
Bacteria	Acidobacteria	Subgroup 17	uncultured Acidobacteria bacterium	Unclassified	Unclassified	0	0.156544	0	0	0	0	0	0	0	0	0	0
Bacteria	Acidobacteria	Subgroup 18	Unclassified	Unclassified	Unclassified	0	0	0	0	0	0	0.0716259	0	0	0	0	0
Bacteria	Acidobacteria	Subgroup 2	Unclassified	Unclassified	Unclassified	0	0	0	0	0	0	0	0.248403	1.34999	0.0959274	0	0
Bacteria	Acidobacteria	Subgroup 2	uncultured Acidobacterium sp.	Unclassified	Unclassified	0	0	0	0	0	0	0	0	0.356318	0	0	0
Bacteria	Acidobacteria	Subgroup 2	uncultured bacterium	Unclassified	Unclassified	0	0	0	0	0	0	0.67533	0	0	0	0	0
Bacteria	Acidobacteria	Subgroup 2	uncultured forest soil bacterium	Unclassified	Unclassified	0	0	0	0	0	0	0	0	0.873231	0	0	0
Bacteria	Acidobacteria	Subgroup 22	Ambiguous_taxa	Unclassified	Unclassified	0	0	0	0	0	0	0	0.319375	0	0	0	0
Bacteria	Acidobacteria	Subgroup 22	Unclassified	Unclassified	Unclassified	0	0	0	0	0	0.427609	0	0	0.823045	0	0	0
Bacteria	Acidobacteria	Subgroup 22	uncultured Acidobacteria bacterium	Unclassified	Unclassified	0	0	0	0	0	0.258179	0	0	0	0	0	0
Bacteria	Acidobacteria	Subgroup 22	uncultured organism	Unclassified	Unclassified	0.296917	0.356919	0	0.0787677	0	0	0	0	0	0	0	0
Bacteria	Acidobacteria	Subgroup 25	uncultured bacterium	Unclassified	Unclassified	0	0	0	0	0	0	0	0.801987	0	0.313944	0	0
Bacteria	Acidobacteria	Subgroup 5	Unclassified	Unclassified	Unclassified	0	0	0	0	0	0	0.276271	0	0.155576	0	0	0
Bacteria	Acidobacteria	Subgroup 6	Unclassified	Unclassified	Unclassified	0	0	0	0	0	0	0	0	0.466727	0	0	0
Bacteria	Acidobacteria	Subgroup 6	uncultured Acidobacterium sp.	Unclassified	Unclassified	0	0	0	0	0	0	0	0	0.321188	0.191855	0	0
Bacteria	Acidobacteria	Subgroup 6	uncultured bacterium gp6	Unclassified	Unclassified	0	0	0	0	0	0	0	0.184528	0	0	0	0
Bacteria	Acidobacteria	Subgroup 6	uncultured prokaryote	Unclassified	Unclassified	0	0	0	0	0	0	0	0	0.10539	0	0	0
Bacteria	Acidobacteria	Subgroup 9	Ambiguous_taxa	Unclassified	Unclassified	0	0.025047	0	0	0	0	0	0	0	0	0	0
Bacteria	Acidobacteria	Subgroup 9	Unclassified	Unclassified	Unclassified	0.48904	0.732624	0	0	0	0	0	0.432931	0.461708	0	0	0
Bacteria	Acidobacteria	Subgroup 9	uncultured bacterium	Unclassified	Unclassified	0.331849	0	0	0	0	0	0	0	0	0	0	0
Bacteria	Actinobacteria	Acidimicrobiia	Acidimicrobiales	Acidimicrobiaceae	Ilumatobacter	0	0.162805	0	0	0	0	0	0	0	0	0	0
Bacteria	Actinobacteria	Acidimicrobiia	Acidimicrobiales	OM1 clade	Unclassified	3.0303	2.5861	0.588296	0.612638	0.35785	0	0	0	0	0	0	0
Bacteria	Actinobacteria	Acidimicrobiia	Acidimicrobiales	OM1 clade	uncultured actinobacterium	0.497773	0.43206	0.42316	0	0	0.286417	0	0	0	0	0	0
Bacteria	Actinobacteria	Acidimicrobiia	Acidimicrobiales	OM1 clade	uncultured Actinomycetales bacterium	0	0.400751	0	0	0	0	0	0	0	0	0	0
Bacteria	Actinobacteria	Acidimicrobiia	Acidimicrobiales	Sva0996 marine group	uncultured actinobacterium	0	0.369443	0	0	0	0	0	0	0	0	0	0
Bacteria	Actinobacteria	Acidimicrobiia	Acidimicrobiales	Unclassified	Unclassified	0	0	0	0	0	0	0.419523	0.141945	0	0	0	0
Bacteria	Actinobacteria	Acidimicrobiia	Acidimicrobiales	uncultured	Ambiguous_taxa	0	0.200376	0	0	0	0	0	0.283889	0.0802971	0	0	0
Bacteria	Actinobacteria	Acidimicrobiia	Acidimicrobiales	uncultured	Unclassified	0	0	0	0	0	0	0	0	0	0	2.43272	1.20676
Bacteria	Actinobacteria	Acidimicrobiia	Acidimicrobiales	uncultured	uncultured Acidimicrobidae bacterium	0	0	0	0	0	0	0	0	0	0.174414	0	0
Bacteria	Actinobacteria	Actinobacteria	Corynebacteriales	Mycobacteriaceae	Mycobacterium	0	0	0.495407	0	0	0	1.52461	0.745209	0.200743	0.89823	1.90056	1.44811
Bacteria	Actinobacteria	Actinobacteria	Corynebacteriales	Nocardiaceae	Rhodococcus	0	0.350657	0	0	0	0	0	0	0	0	0	0
Bacteria	Actinobacteria	Actinobacteria	Frankiales	Acidothermaceae	Acidothermus	0	0	0	0	0	0	0	0.645848	0	0.104648	0	1.17994
Bacteria	Actinobacteria	Actinobacteria	Frankiales	Frankiaceae	Jatrophihabitans	0	0	0.144494	0	0	0	0	0	0	0	0	0
Bacteria	Actinobacteria	Actinobacteria	Micrococcales	Intrasporangiaceae	Tetrasphaera	0	0	0.485086	0	0.255607	0	0	0	0	0	0	0
Bacteria	Actinobacteria	Actinobacteria	Micrococcales	Microbacteriaceae	Unclassified	0	0	0	0	0	0	0.399059	0	0	0	0	0
Bacteria	Actinobacteria	Actinobacteria	Micromonosporales	Micromonosporaceae	Ambiguous_taxa	0	0	0	0	0	0	0	0	0	0.340106	0	0
Bacteria	Actinobacteria	Actinobacteria	Micromonosporales	Micromonosporaceae	Luedemannella	0	0	0	0	0	0	0	0	0	0.566844	0	0
Bacteria	Actinobacteria	Actinobacteria	Micromonosporales	Micromonosporaceae	Unclassified	0	0	0	0	0	0	0	0	0	0.174414	0	0
Bacteria	Actinobacteria	Actinobacteria	Propionibacteriales	Nocardioidaceae	Nocardioides	0	0	0	0	0	0	0	0	0	0.688933	0	0
Bacteria	Actinobacteria	Actinobacteria	Pseudonocardiales	Pseudonocardiaceae	Pseudonocardia	0	0	0	0	0	0	0.685562	0.92264	0.185687	0	0	0
Bacteria	Actinobacteria	Actinobacteria	Unclassified	Unclassified	Unclassified	0	0	0	0	0	0	0	0	0	0.845906	0	0
Bacteria	Actinobacteria	MB-A2-108	Ambiguous_taxa	Unclassified	Unclassified	0	0	0	0	0	0	0	0.149042	0.516913	0	0	0
Bacteria	Actinobacteria	MB-A2-108	Unclassified	Unclassified	Unclassified	0	0	0	0	0	0	0	0.418737	0	0.13081	0	0
Bacteria	Actinobacteria	OPB41	uncultured organism	Unclassified	Unclassified	0	0	0	0	0	0.455847	0	0	0	0	0	0
Bacteria	Actinobacteria	Thermoleophilia	Gaiellales	Gaiellaceae	Gaiella	0	0	0	0	0	0	3.42781	3.00213	1.621	0.749978	0	0
Bacteria	Actinobacteria	Thermoleophilia	Gaiellales	uncultured	Unclassified	0	0	0	0	0	0	0.347897	0.482612	0.255947	0.51452	0	0
Bacteria	Actinobacteria	Thermoleophilia	Gaiellales	uncultured	uncultured actinobacterium	0	0	0	0	0	0	0	0	0	0.540682	0	0
Bacteria	Actinobacteria	Thermoleophilia	Solirubrobacterales	Elev-16S-1332	uncultured bacterium	0	0	0	0	0	0	0	0	0	0.409872	0	0
Bacteria	Aminicenantes	Unclassified	Unclassified	Unclassified	Unclassified	0	0	0	0	0	0.290451	0	0	0	0	0	0
Bacteria	Armatimonadetes	Chthonomonadetes	Chthonomonadales	Chthonomonadaceae	Chthonomonas	0	0	0	0	0	0	0.0818582	0	0	0	0	0
Bacteria	Armatimonadetes	Chthonomonadetes	Chthonomonadales	uncultured bacterium	Unclassified	0	0	0	0	0	0	0.0818582	0.156139	0.03513	0	0	0
Bacteria	Armatimonadetes	Fimbriimonadia	Fimbriimonadales	Fimbriimonadaceae	uncultured bacterium	0	0	0	0	0	0	0.603704	0	0	0	0	0
Bacteria	Armatimonadetes	Fimbriimonadia	Fimbriimonadales	uncultured bacterium	Unclassified	0	0	0	0	0	0	0	0.390348	0	0.139531	0	0
Bacteria	Bacteroidetes	Bacteroidetes BD2-2	Ambiguous_taxa	Unclassified	Unclassified	0	0	0	0	0	0.254145	0	0	0	0	0	0
Bacteria	Bacteroidetes	Bacteroidetes BD2-2	Unclassified	Unclassified	Unclassified	0	0	0.650222	1.69788	2.13432	0.746299	0	0	0	0	0	0
Bacteria	Bacteroidetes	Bacteroidetes BD2-2	uncultured Bacteroidetes bacterium	Unclassified	Unclassified	0	0	0	0	0.440923	0	0	0	0	0	0.106432	0
Bacteria	Bacteroidetes	Bacteroidetes Incertae Sedis	Order II	Rhodothermaceae	Unclassified	0	0	0	0	0.0255607	0	0	0	0	0	0	0
Bacteria	Bacteroidetes	Bacteroidetes Incertae Sedis	Order II	Rhodothermaceae	uncultured	1.51079	0.82655	0	0	0	0	0	0	0	0	0	0
Bacteria	Bacteroidetes	Bacteroidetes Incertae Sedis	Order III	MAT-CR-P4-C12	uncultured bacterium	0	0	0.340592	0.0612638	0	0	0	0	0	0	0	0
Bacteria	Bacteroidetes	Bacteroidetes Incertae Sedis	Order III	Unknown Family	Unclassified	0	0.0751409	0	0	0	0	0	0	0	0	0	0
Bacteria	Bacteroidetes	Bacteroidetes VC2.1 Bac22	Unclassified	Unclassified	Unclassified	0	0	0.0928888	2.93191	0	0	0	0	0	0	0	0
Bacteria	Bacteroidetes	Bacteroidetes VC2.1 Bac22	uncultured bacterium	Unclassified	Unclassified	0	0	0	0.463854	0	0	0	0	0	0	0	0
Bacteria	Bacteroidetes	Bacteroidetes VC2.1 Bac22	uncultured Bacteroidetes bacterium	Unclassified	Unclassified	0	0	1.02178	0.691406	1.27804	0.484086	0	0	0	0	0	0
Bacteria	Bacteroidetes	Bacteroidia	Bacteroidales	Bacteroidaceae	Bacteroides	0	0	0	0	0.0191706	0	0	0	0	0	0	0
Bacteria	Bacteroidetes	Bacteroidia	Bacteroidales	LKC2.127-25	uncultured bacterium	0	0	0	0.341327	0.255607	0	0	0	0	0	0	0
Bacteria	Bacteroidetes	Bacteroidia	Bacteroidales	Marinilabiaceae	Carboxylicivirga	0	0	0.660543	0.288815	0	0	0	0	0	0	0	0
Bacteria	Bacteroidetes	Bacteroidia	Bacteroidales	Marinilabiaceae	Saccharicrinis	0	0	0	0	0.69653	0	0	0	0	0	0	0
Bacteria	Bacteroidetes	Bacteroidia	Bacteroidales	Porphyromonadaceae	Microbacter	0	0	0	0	0.492044	0	0	0	0	0	0	0
Bacteria	Bacteroidetes	Bacteroidia	Bacteroidales	Porphyromonadaceae	uncultured	0	0	0	0	0.389801	0	0	0	0	0	0	0
Bacteria	Bacteroidetes	Bacteroidia	Bacteroidales	Prevotellaceae	Prevotella	0	0	0	0	0	0	0	0	0	0	0.334499	0
Bacteria	Bacteroidetes	Bacteroidia	Bacteroidales	Prolixibacteraceae	Prolixibacter	0	0	2.07452	0.997724	1.66145	0	0	0	0	0	0	0
Bacteria	Bacteroidetes	Bacteroidia	Bacteroidales	Unclassified	Unclassified	0	0	0	0	0.383411	0	0	0	0	0	0	0
Bacteria	Bacteroidetes	Bacteroidia	Bacteroidia Incertae Sedis	Draconibacteriaceae	Draconibacterium	0	0	0	0	0.460093	0	0	0	0	0	0	0
Bacteria	Bacteroidetes	Bacteroidia	Bacteroidia Incertae Sedis	Draconibacteriaceae	Unclassified	0	0	0.897925	0.411343	0.67736	0	0	0	0	0	0	0
Bacteria	Bacteroidetes	Cytophagia	Cytophagales	Cytophagaceae	Chryseolinea	0	0	0	0	0	0	0	0	0	0.671492	0	0
Bacteria	Bacteroidetes	Cytophagia	Cytophagales	Cytophagaceae	Unclassified	0	0.507201	0	0	0	0	0	0	0.235873	0.627889	0	0
Bacteria	Bacteroidetes	Cytophagia	Cytophagales	Cytophagaceae	uncultured	0	0.726362	0	0	0	0	2.78318	1.82399	0.998695	0.76742	0	0
Bacteria	Bacteroidetes	Cytophagia	Cytophagales	Flammeovirgaceae	Candidatus Amoebophilus	0	0	0	0	0	0	0.102323	0	0.115427	0	0	0
Bacteria	Bacteroidetes	Cytophagia	Cytophagales	Flammeovirgaceae	Ekhidna	0	0.175329	0	0	0	0	0	0	0	0	0	0
Bacteria	Bacteroidetes	Cytophagia	Cytophagales	Flammeovirgaceae	Fulvivirga	0	0.28804	0	0	0	0	0	0	0	0	0	0
Bacteria	Bacteroidetes	Cytophagia	Cytophagales	Flammeovirgaceae	Marinoscillum	0	0.457107	0	0	0	0	0	0	0	0	0	0
Bacteria	Bacteroidetes	Cytophagia	Cytophagales	Flammeovirgaceae	Roseivirga	0	0.444584	0	0	0	0	0	0	0	0	0	0
Bacteria	Bacteroidetes	Cytophagia	Cytophagales	Flammeovirgaceae	Unclassified	0.951882	0.613651	0	0	0	0	0	0	0	0	0	0
Bacteria	Bacteroidetes	Cytophagia	Cytophagales	Flammeovirgaceae	uncultured	0.628766	1.15842	0	0.0437598	0.261998	0.125055	0	0	0	0	0	0
Bacteria	Bacteroidetes	Cytophagia	Cytophagales	MWH-CFBk5	uncultured bacterium	0.340582	0	0	0	0	0	0	0	0	0	0	0
Bacteria	Bacteroidetes	Cytophagia	Cytophagales	Unclassified	Unclassified	0	0	0	0	0.108633	0	0	0	0.0652414	0	0	0
Bacteria	Bacteroidetes	Flavobacteriia	Flavobacteriales	Cryomorphaceae	Crocinitomix	0	0	0	0	0.581507	0	0	0	0	0	0	0
Bacteria	Bacteroidetes	Flavobacteriia	Flavobacteriales	Cryomorphaceae	Fluviicola	0	0	0	0	0.428142	0	0	0	0	0	0	0
Bacteria	Bacteroidetes	Flavobacteriia	Flavobacteriales	Cryomorphaceae	Luteibaculum	0	0.388228	0	0	0	0	0	0	0	0	0	0
Bacteria	Bacteroidetes	Flavobacteriia	Flavobacteriales	Cryomorphaceae	NS10 marine group	0	0	0	0	0	0	0	0	0.110409	0	0	0
Bacteria	Bacteroidetes	Flavobacteriia	Flavobacteriales	Cryomorphaceae	Unclassified	0	0	0	0	0	0.0524426	0	0	0	0	0	0
Bacteria	Bacteroidetes	Flavobacteriia	Flavobacteriales	Cryomorphaceae	uncultured	0.934416	1.18347	0	0	1.54003	0	0	0	0	0	0	0
Bacteria	Bacteroidetes	Flavobacteriia	Flavobacteriales	Flavobacteriaceae	Actibacter	0.18339	0	0	0	0	0	0	0	0	0	0	0
Bacteria	Bacteroidetes	Flavobacteriia	Flavobacteriales	Flavobacteriaceae	Arenibacter	0	0.519724	0	0	0.370631	0	0	0	0	0	0	0
Bacteria	Bacteroidetes	Flavobacteriia	Flavobacteriales	Flavobacteriaceae	Cloacibacterium	0	0	0	0	0	0	0	0	0	0	0.334499	0
Bacteria	Bacteroidetes	Flavobacteriia	Flavobacteriales	Flavobacteriaceae	Flavobacterium	0	0.513463	0	0	0	0	0	0	0	0	0.091227	0
Bacteria	Bacteroidetes	Flavobacteriia	Flavobacteriales	Flavobacteriaceae	Hoppeia	0	0	1.21788	0	0	0	0	0	0	0	0	0
Bacteria	Bacteroidetes	Flavobacteriia	Flavobacteriales	Flavobacteriaceae	Lutibacter	0	0	0	0	0.773212	0.0927831	0	0	0	0	0	0
Bacteria	Bacteroidetes	Flavobacteriia	Flavobacteriales	Flavobacteriaceae	Maribacter	0	0	0	0	0.255607	0	0	0	0	0	0	0
Bacteria	Bacteroidetes	Flavobacteriia	Flavobacteriales	Flavobacteriaceae	Maritimimonas	0	0	0	1.36531	0.274778	0	0	0	0	0	0	0
Bacteria	Bacteroidetes	Flavobacteriia	Flavobacteriales	Flavobacteriaceae	Muricauda	0	0.225423	0	0	0.364241	0	0	0	0	0	0	0
Bacteria	Bacteroidetes	Flavobacteriia	Flavobacteriales	Flavobacteriaceae	Ulvibacter	1.03048	0.507201	0	0	0	0	0	0	0	0	0	0
Bacteria	Bacteroidetes	Flavobacteriia	Flavobacteriales	Flavobacteriaceae	Unclassified	0.506506	1.08328	0	0	1.26526	0.879422	0	0	0	0	0	0
Bacteria	Bacteroidetes	Flavobacteriia	Flavobacteriales	Flavobacteriaceae	Winogradskyella	0	0	0	0	0.313119	0	0	0	0	0	0	0
Bacteria	Bacteroidetes	Flavobacteriia	Flavobacteriales	NS7 marine group	uncultured bacterium	0	0	0	0	0.364241	0	0	0	0	0	0	0
Bacteria	Bacteroidetes	Flavobacteriia	Flavobacteriales	NS9 marine group	Unclassified	0	0	0	0	0	0	0.163716	0	0	0	0	0
Bacteria	Bacteroidetes	Flavobacteriia	Flavobacteriales	Schleiferiaceae	Schleiferia	0	0	0	0	0.402582	0	0	0	0	0	0	0
Bacteria	Bacteroidetes	Flavobacteriia	Flavobacteriales	Unclassified	Unclassified	0.838355	0	0	0	0	0	0	0	0	0	0	0
Bacteria	Bacteroidetes	Ika33	uncultured bacterium	Unclassified	Unclassified	0	0	0	0	0.0575117	0	0	0	0	0	0	0
Bacteria	Bacteroidetes	Sphingobacteriia	Sphingobacteriales	Chitinophagaceae	Ferruginibacter	0	0	0	0	0	0	0.665098	0	0	0	0	0
Bacteria	Bacteroidetes	Sphingobacteriia	Sphingobacteriales	Chitinophagaceae	Sediminibacterium	0	0	0	0.0350079	0	0	0	0	0	0	0	0
Bacteria	Bacteroidetes	Sphingobacteriia	Sphingobacteriales	Chitinophagaceae	Taibaiella	0	0	0	0	0.268388	0	0	0	0.14052	0	0	0
Bacteria	Bacteroidetes	Sphingobacteriia	Sphingobacteriales	Chitinophagaceae	Unclassified	0	0	0	0	0	0	1.97483	0.880057	0.230854	0.880788	0	0
Bacteria	Bacteroidetes	Sphingobacteriia	Sphingobacteriales	Chitinophagaceae	uncultured	0	0	0	0	0.402582	0	0	0.418737	0	0	0	0
Bacteria	Bacteroidetes	Sphingobacteriia	Sphingobacteriales	env.OPS 17	Unclassified	0	0	0	0	0	0	0.521846	0.652945	0.662451	1.12497	0	0
Bacteria	Bacteroidetes	Sphingobacteriia	Sphingobacteriales	KD3-93	uncultured bacterium	0	0	0	0	0	0	0.58324	0.468417	0.361337	0.401151	0	0
Bacteria	Bacteroidetes	Sphingobacteriia	Sphingobacteriales	Lentimicrobiaceae	Unclassified	0	0	0.268346	0.332575	1.04799	0	0	0	0	0	0	0
Bacteria	Bacteroidetes	Sphingobacteriia	Sphingobacteriales	Lentimicrobiaceae	uncultured Bacteroidetes bacterium	0	0	0	0	0	0.141192	0	0	0	0	0	0
Bacteria	Bacteroidetes	Sphingobacteriia	Sphingobacteriales	Lentimicrobiaceae	uncultured organism	0	0	0	0	0.274778	0	0	0	0	0	0	0
Bacteria	Bacteroidetes	Sphingobacteriia	Sphingobacteriales	NS11-12 marine group	Ambiguous_taxa	0	0	0	0	0	0	0	0.312278	0	0.366268	0	0
Bacteria	Bacteroidetes	Sphingobacteriia	Sphingobacteriales	NS11-12 marine group	Unclassified	0	0.457107	0	0	0	0	0	0	0	0	0	0
Bacteria	Bacteroidetes	Sphingobacteriia	Sphingobacteriales	NS11-12 marine group	uncultured Bacteroidetes bacterium	0.0785958	0.100188	0	0	0	0	0	0	0	0	0	0
Bacteria	Bacteroidetes	Sphingobacteriia	Sphingobacteriales	PHOS-HE51	Unclassified	0	0	0	0	0	0	0	0.0567779	0	0	0	0
Bacteria	Bacteroidetes	Sphingobacteriia	Sphingobacteriales	Saprospiraceae	Aureispira	0.130993	0.25047	0	0	0	0	0	0	0	0	0	0
Bacteria	Bacteroidetes	Sphingobacteriia	Sphingobacteriales	Saprospiraceae	Lewinella	0.515239	0.701315	0	0	0	0	0	0	0	0	0	0
Bacteria	Bacteroidetes	Sphingobacteriia	Sphingobacteriales	Saprospiraceae	Phaeodactylibacter	0.288184	0	0	0	0	0	0.306968	0	0.240891	0	0	0
Bacteria	Bacteroidetes	Sphingobacteriia	Sphingobacteriales	Saprospiraceae	Portibacter	0.567636	0.28804	0	0	0	0	0	0	0	0	0	0
Bacteria	Bacteroidetes	Sphingobacteriia	Sphingobacteriales	Saprospiraceae	Unclassified	0	0	0	0	0	0.133124	0.470685	0	0	0.409872	0	0
Bacteria	Bacteroidetes	Sphingobacteriia	Sphingobacteriales	Saprospiraceae	uncultured	1.06541	0.244208	0	0	0.146974	0	1.22787	0	0.220817	0.38371	0	0
Bacteria	Bacteroidetes	Sphingobacteriia	Sphingobacteriales	ST-12K33	Unclassified	0	0	0.309629	0.113776	0	0	0	0	0	0	0	0
Bacteria	Bacteroidetes	Sphingobacteriia	Sphingobacteriales	Unclassified	Unclassified	0	0	0	0.455102	0	0	0	0.12775	0.361337	0	0	0
Bacteria	Bacteroidetes	Sphingobacteriia	Sphingobacteriales	uncultured	Unclassified	0	0	0	0	0	0	0	0.234209	0	0	0	0
Bacteria	Bacteroidetes	Unclassified	Unclassified	Unclassified	Unclassified	0.567636	0.275517	0	0	2.52412	0	0	0	0.145538	0	0	0
Bacteria	BRC1	uncultured organism	Unclassified	Unclassified	Unclassified	0	0	0	0	0	0.0927831	0	0	0	0	0	0
Bacteria	Caldiserica	Caldisericia	Caldisericales	LF045	uncultured organism	0	0	0.175457	0.0700158	0	0	0	0	0	0	0	0
Bacteria	Chlamydiae	Chlamydiae	Chlamydiales	cvE6	Unclassified	0	0	0	0.568878	0	0	0	0.141945	0	0	0	0
Bacteria	Chlamydiae	Chlamydiae	Chlamydiales	cvE6	uncultured bacterium	0	0	0.547012	0	0	0	1.68832	1.10717	0.271003	0.287782	0	0
Bacteria	Chlamydiae	Chlamydiae	Chlamydiales	Parachlamydiaceae	Candidatus Protochlamydia	0	0	0	0.0700158	0	0	0.429755	0	0	0.165693	0	0
Bacteria	Chlamydiae	Chlamydiae	Chlamydiales	Simkaniaceae	uncultured	0.471575	0.100188	1.83713	0.105024	0.434533	0	2.31249	1.7956	1.47044	0.331386	0.729816	3.11075
Bacteria	Chlamydiae	Chlamydiae	Chlamydiales	Unclassified	Unclassified	0	0	2.05388	0.315071	0.421752	0	0	0	0.451671	0	0	0
Bacteria	Chlamydiae	LD1-PA32	uncultured bacterium	Unclassified	Unclassified	0	0	0.73279	0.323823	0	0.649482	0	0	0	0	0	0
Bacteria	Chlamydiae	LD1-PA32	uncultured sediment bacterium	Unclassified	Unclassified	0	0	0	0	0	0.0645448	0	0	0	0	0	0
Bacteria	Chlorobi	Chlorobia	Chlorobiales	OC31	uncultured bacterium	0	0	0	0	0	0	0	0.0709723	0.265984	0	0	0
Bacteria	Chlorobi	Chlorobia	Chlorobiales	OPB56	Unclassified	0	0	0	0	0	0	0.706027	0	0	0.357548	0	0
Bacteria	Chlorobi	Chlorobia	Chlorobiales	OPB56	uncultured bacterium	0	0	0	0	0	0	0.706027	0.319375	0.707618	0.113369	0	0
Bacteria	Chlorobi	Chlorobia	Chlorobiales	OPB56	uncultured organism	0	0	0.350913	0.350079	0	0	0	0	0	0	0	0
Bacteria	Chlorobi	Chlorobia	Chlorobiales	SJA-28	uncultured bacterium	0	0	0	0	0	0.0484086	0.306968	0.319375	0.0853157	0.296503	0	0
Bacteria	Chloroflexi	Anaerolineae	Anaerolineales	Anaerolineaceae	Anaerolineaceae UCG-001	0	0	0	0	0.492044	0	0	0	0	0	0	0
Bacteria	Chloroflexi	Anaerolineae	Anaerolineales	Anaerolineaceae	Thermomarinilinea	0	0	0.897925	1.07649	0.549556	1.27879	0	0	0	0	0	0
Bacteria	Chloroflexi	Anaerolineae	Anaerolineales	Anaerolineaceae	Unclassified	0	0	0	0.892701	0.210876	0	0	0	0	0	0	0
Bacteria	Chloroflexi	Anaerolineae	Anaerolineales	Anaerolineaceae	uncultured	1.8601	1.5717	4.19032	1.55785	4.26864	5.21199	1.11532	2.01561	0.381411	1.3081	0.106432	0
Bacteria	Chloroflexi	Ardenticatenia	uncultured	Ambiguous_taxa	Unclassified	0	0	0.454123	0	0	0.270281	0	0	0	0	0	0
Bacteria	Chloroflexi	Ardenticatenia	uncultured	Unclassified	Unclassified	0.646232	0.745147	0.516049	2.31927	0.894626	0.544596	0	0.0780696	0.07026	0	0	0
Bacteria	Chloroflexi	Ardenticatenia	uncultured	uncultured organism	Unclassified	0	0	0	0	0	0.403405	0	0	0	0	0	0
Bacteria	Chloroflexi	Caldilineae	Caldilineales	Caldilineaceae	Litorilinea	0	0	0	0	0	0	0	0	0	0.113369	0	0
Bacteria	Chloroflexi	Caldilineae	Caldilineales	Caldilineaceae	Unclassified	0	0	0	0	0	0	0	0	0.0200743	0	0	0
Bacteria	Chloroflexi	Chloroflexia	Chloroflexales	Roseiflexaceae	Roseiflexus	0	0	0	0	0	0	0.0511614	0	0	0	0	0
Bacteria	Chloroflexi	Dehalococcoidia	Unclassified	Unclassified	Unclassified	0	0	0	0	0	0.145226	0	0	0	0	0	0
Bacteria	Chloroflexi	Elev-1554	uncultured bacterium	Unclassified	Unclassified	0	0	0	0	0	0	0	0.0425834	0	0	0	0
Bacteria	Chloroflexi	Gitt-GS-136	uncultured bacterium	Unclassified	Unclassified	0	0	0	0	0	0	0	0	0.130483	0	0	0
Bacteria	Chloroflexi	JG30-KF-CM66	Ambiguous_taxa	Unclassified	Unclassified	0	0	0	0	0	0	0	0	0	0.531961	0	0
Bacteria	Chloroflexi	JG30-KF-CM66	Unclassified	Unclassified	Unclassified	0	0	0	0	0	0	0	0.418737	0.0903342	0	0	0
Bacteria	Chloroflexi	JG30-KF-CM66	uncultured bacterium	Unclassified	Unclassified	0	0	0	0	0	0	0.439988	0	0.787915	0	0	0
Bacteria	Chloroflexi	JG30-KF-CM66	uncultured Chloroflexi bacterium	Unclassified	Unclassified	0.139726	0.175329	0	0	0	0	0	0.12775	0	0	0	0
Bacteria	Chloroflexi	KD4-96	Unclassified	Unclassified	Unclassified	0	0	0	0	0	0	0.624169	0.908446	0.331226	0.427313	0	0
Bacteria	Chloroflexi	Ktedonobacteria	C0119	uncultured bacterium	Unclassified	0	0	0	0	0	0	1.13578	0.2555	0.185687	0	0	0
Bacteria	Chloroflexi	Ktedonobacteria	C0119	uncultured Chloroflexi bacterium	Unclassified	0	0	0	0	0	0	0	0.752307	0	0	0	0
Bacteria	Chloroflexi	Ktedonobacteria	JG30-KF-AS9	uncultured bacterium	Unclassified	0	0	0	0	0	0	1.06416	0.447126	0.120446	2.71213	0	0
Bacteria	Chloroflexi	Ktedonobacteria	Ktedonobacterales	Ktedonobacteraceae	uncultured	0	0	0	0	0	0	0	0.170334	0	0	0	0
Bacteria	Chloroflexi	Ktedonobacteria	MVP-21	uncultured organism	Unclassified	0	0	0	0	0	0.0322724	0	0	0	0	0	0
Bacteria	Chloroflexi	S085	Unclassified	Unclassified	Unclassified	0	0	0	0	0	0	0	0.163236	0.255947	0	0	0
Bacteria	Chloroflexi	S085	uncultured bacterium	Unclassified	Unclassified	0	0	0	0	0	0	0	0	0.3513	0	0	0
Bacteria	Chloroflexi	S085	uncultured Chloroflexi bacterium	Unclassified	Unclassified	0	0	0	0	0	0	0	0	0.150557	0	0	0
Bacteria	Chloroflexi	SAR202 clade	Ambiguous_taxa	Unclassified	Unclassified	0	0.275517	0	0	0	0	0	0	0	0	0	0
Bacteria	Chloroflexi	SAR202 clade	Unclassified	Unclassified	Unclassified	0.969348	0.28804	0	0	0	0	0	0	0.0552043	0	0	0
Bacteria	Chloroflexi	SBR2076	uncultured Caldilineaceae bacterium	Unclassified	Unclassified	0	0	0	0	0	0	0.890208	0.780696	0	0.139531	0	0
Bacteria	Chloroflexi	SBR2076	uncultured soil bacterium	Unclassified	Unclassified	0	0	0	0	0	0	0.890208	0.546487	0.391448	0.601727	0	0
Bacteria	Chloroflexi	SHA-26	uncultured Chloroflexi bacterium	Unclassified	Unclassified	0	0	0	0	0	0	0	0.106458	0	0	0	0
Bacteria	Chloroflexi	SJA-68	uncultured bacterium	Unclassified	Unclassified	0	0	0	0	0	0.238009	0	0	0	0	0	0
Bacteria	Chloroflexi	Thermomicrobia	AKYG1722	uncultured Chloroflexi bacterium	Unclassified	0	0.0375704	0	0	0	0	0	0	0	0	0	0
Bacteria	Chloroflexi	Thermomicrobia	Sphaerobacterales	Sphaerobacteraceae	Nitrolancea	0	0	0	0	0	0	0.368362	0.532292	0.341263	0.38371	0	0
Bacteria	Chloroflexi	TK10	Unclassified	Unclassified	Unclassified	0	0	0	0	0	0	0.3172	0.354862	0	0	0	0
Bacteria	Chloroflexi	TK10	uncultured bacterium	Unclassified	Unclassified	0	0	0	0	0	0	0	0.567779	0.381411	0.331386	0	0
Bacteria	Chloroflexi	TK10	uncultured Chloroflexi bacterium	Unclassified	Unclassified	0	0	0	0	0	0	0	0.0780696	0.180668	0.104648	0	0
Bacteria	Chloroflexi	Unclassified	Unclassified	Unclassified	Unclassified	0	0	0	0	0	0.685788	0	0	0	0	0	0
Bacteria	Cyanobacteria	Chloroplast	Pylaiella littoralis	Unclassified	Unclassified	0	0	0	0	0.108633	0	0	0	0	0	0	0
Bacteria	Cyanobacteria	Chloroplast	uncultured diatom	Unclassified	Unclassified	0	0	0	0.0437598	0	0	0	0	0	0	0	0
Bacteria	Cyanobacteria	Chloroplast	Virgulinella fragilis	Unclassified	Unclassified	0	0	0	0	0	0.125055	0	0	0	0	0	0
Bacteria	Cyanobacteria	Melainabacteria	Gastranaerophilales	uncultured organism	Unclassified	0	0	0.639901	0.306319	0.281168	0	0	0	0	0	0	0
Bacteria	Cyanobacteria	Melainabacteria	Obscuribacterales	Ambiguous_taxa	Unclassified	0	0	0	0	0	0	0	0	0.255947	0	0	0
Bacteria	Cyanobacteria	Melainabacteria	Obscuribacterales	Unclassified	Unclassified	0.235787	0	0	0.0437598	0	0	0	0	0	0	0	0
Bacteria	Cyanobacteria	Melainabacteria	Obscuribacterales	uncultured bacterium	Unclassified	0	0	0	0	0	0	1.56554	0.972321	0.130483	0.505799	0	1.23357
Bacteria	Cyanobacteria	Melainabacteria	Unclassified	Unclassified	Unclassified	0	0	0	0	0	0.0645448	0	0	0	0	0	0
Bacteria	Cyanobacteria	Melainabacteria	Vampirovibrionales	uncultured bacterium	Unclassified	0	0	0	0	0	0	0	0.0425834	0	0	0	0
Bacteria	Deferribacteres	Deferribacteres Incertae Sedis	Unknown Order	Unknown Family	Caldithrix	1.65051	1.17095	1.09402	6.15263	0.964918	2.62213	0.173949	0.674237	0.366356	0	0.121636	0
Bacteria	Deinococcus-Thermus	Deinococci	Deinococcales	Trueperaceae	Truepera	0	0	0	0.0875197	0	0	0	0	0	0	0	0
Bacteria	Elusimicrobia	Elusimicrobia	Lineage IIb	uncultured bacterium	Unclassified	0	0.582342	0	0	0.0447313	0	0	0.305181	0.195724	0.218017	0	0
Bacteria	Elusimicrobia	Elusimicrobia	Lineage IV	uncultured bacterium	Unclassified	0	0	0	0	0	0	0	0.0851668	0	0	0	0
Bacteria	Elusimicrobia	Elusimicrobia	MVP-88	uncultured bacterium	Unclassified	0	0	0	0	0	0	0	0	0	0.165693	0	0
Bacteria	Elusimicrobia	Elusimicrobia	Rs-M47	Unclassified	Unclassified	0	0	0	0	0.0127804	0	0	0	0	0	0	0
Bacteria	Fibrobacteres	Chitinivibrionia	possible order 07	uncultured bacterium	Unclassified	0	0	0	0	0.0830724	0.112953	0	0	0	0	0	0
Bacteria	Fibrobacteres	Fibrobacteria	Fibrobacterales	09D2Z46	uncultured organism	0	0	0.175457	0	0	0	0	0	0	0	0	0
Bacteria	Fibrobacteres	Fibrobacteria	Fibrobacterales	Fibrobacteraceae	uncultured	0	0	0	0	0	0.116987	0	0	0	0	0	0
Bacteria	Fibrobacteres	Fibrobacteria	Fibrobacterales	Unclassified	Unclassified	0	0.0125235	0	0	0	0	0	0	0	0	0	0
Bacteria	Firmicutes	Bacilli	Bacillales	Alicyclobacillaceae	Acidibacillus	0	0	0	0	0	0	0	0	0	0	1.24677	1.36766
Bacteria	Firmicutes	Bacilli	Bacillales	Alicyclobacillaceae	Alicyclobacillus	0	0	0	0	0	0	0	0	0.120446	0	0	0
Bacteria	Firmicutes	Bacilli	Bacillales	Alicyclobacillaceae	Tumebacillus	0	0	0	0	0	0	0	0	0.441634	0.453475	0	0
Bacteria	Firmicutes	Bacilli	Bacillales	Bacillaceae	Bacillus	0	0	0	0	0	0	0	0	0	1.53484	0	0
Bacteria	Firmicutes	Bacilli	Bacillales	Paenibacillaceae	Paenibacillus	0	0	0	0	0	0	0.439988	0.198722	0.145538	0.2529	0	2.62805
Bacteria	Firmicutes	Bacilli	Bacillales	Staphylococcaceae	Staphylococcus	0	0	0	0	0	0	0	0	0	0	0.47134	0
Bacteria	Firmicutes	Bacilli	Bacillales	uncultured	uncultured bacterium	0	0	0	0	0	0	0	0	0	0.584285	0	0
Bacteria	Firmicutes	Bacilli	Lactobacillales	Streptococcaceae	Streptococcus	0	0	0	0	0	0	0	0	0	0	0.77543	0
Bacteria	Firmicutes	Clostridia	Clostridiales	Christensenellaceae	uncultured	0	0	0	0	0.159755	0	0	0	0	0	0	0
Bacteria	Firmicutes	Clostridia	Clostridiales	Clostridiaceae 2	Alkaliphilus	0	0	0	0	0.498434	0	0	0	0	0	0	0
Bacteria	Firmicutes	Clostridia	Clostridiales	Clostridiales Incertae Sedis	Dethiosulfatibacter	0	0	0	0	0.33229	0	0	0	0	0	0	0
Bacteria	Firmicutes	Clostridia	Clostridiales	Family XI	Finegoldia	0	0	0	0	0	0	0	0	0	0	0.212863	0
Bacteria	Firmicutes	Clostridia	Clostridiales	Family XII	Fusibacter	0	0	0	0	0.734871	0	0	0	0	0	0	0
Bacteria	Firmicutes	Clostridia	Clostridiales	Family XVII	Sulfobacillus	0	0	0	0	0	0	0	0	0	0	4.02919	1.68946
Bacteria	Firmicutes	Clostridia	Clostridiales	Family XVII	uncultured	0	0	0	0	0	0	0	0	0	0	0.745021	1.17994
Bacteria	Firmicutes	Clostridia	Clostridiales	JTB215	uncultured bacterium	0	0	0	0	0.198096	0	0	0	0	0	0	0
Bacteria	Firmicutes	Clostridia	Clostridiales	Lachnospiraceae	Unclassified	0	0	0	0	0.434533	0	0	0	0	0	0	0
Bacteria	Firmicutes	Clostridia	Clostridiales	Peptococcaceae	Unclassified	0	0	0	0	0.236437	0	0	0	0	0	0	0
Bacteria	Firmicutes	Clostridia	Clostridiales	Ruminococcaceae	uncultured	0	0	0	0	0.230047	0	0	0	0	0	0	0
Bacteria	Firmicutes	Clostridia	Clostridiales	Unclassified	Unclassified	0	0	0	0	0.658189	0	0	0	0	0	0	0
Bacteria	Firmicutes	Clostridia	Clostridiales	uncultured	uncultured bacterium	0	0	0	0	0.383411	0	0	0	0	0	0	0
Bacteria	Firmicutes	Clostridia	Halanaerobiales	ODP1230B8.23	uncultured bacterium	0	0	0	0	0	0	0	0.2555	0	0	0	0
Bacteria	Firmicutes	Clostridia	Halanaerobiales	ODP1230B8.23	uncultured organism	0	0	0	0.883949	0	0	0	0	0	0	0	0
Bacteria	Firmicutes	Clostridia	Unclassified	Unclassified	Unclassified	0	0	0	0	0	0	0	0	0	0	1.06432	0
Bacteria	Firmicutes	Unclassified	Unclassified	Unclassified	Unclassified	0	0	0	0	0	0	0	0	0.0903342	0	0	0
Bacteria	Fusobacteria	Fusobacteriia	Fusobacteriales	Leptotrichiaceae	uncultured	0	0	0	0.0787677	0	0	0	0	0	0	0	0
Bacteria	GAL15	uncultured bacterium	Unclassified	Unclassified	Unclassified	0	0	0	0	0	0	0.102323	0	0.381411	0	0	0
Bacteria	Gemmatimonadetes	BD2-11 terrestrial group	Ambiguous_taxa	Unclassified	Unclassified	0.532705	0.657483	0	0	0	0	0	0	0	0	0	0
Bacteria	Gemmatimonadetes	BD2-11 terrestrial group	Unclassified	Unclassified	Unclassified	0	0	0	0	0	0	0	0.2555	0.110409	0	0	0
Bacteria	Gemmatimonadetes	BD2-11 terrestrial group	uncultured Gemmatimonadetes bacterium	Unclassified	Unclassified	0	0	0.433481	0	0	0	0.235342	0	0	0	0	0
Bacteria	Gemmatimonadetes	BD2-11 terrestrial group	uncultured organism	Unclassified	Unclassified	0	0	0	0	0	0.411473	0	0	0	0	0	0
Bacteria	Gemmatimonadetes	Gemmatimonadetes	Gemmatimonadales	Gemmatimonadaceae	Gemmatimonas	0	0	0	0	0	0	0	1.14265	0	1.18601	0	0
Bacteria	Gemmatimonadetes	Gemmatimonadetes	Gemmatimonadales	Gemmatimonadaceae	Unclassified	0	0	0	0	0	0	0	1.0149	0.240891	0.549403	0	0
Bacteria	Gemmatimonadetes	Gemmatimonadetes	Gemmatimonadales	Gemmatimonadaceae	uncultured	0.471575	0.43206	0	0	0	0.67772	2.82411	3.37828	2.25334	1.89239	0	0
Bacteria	Gemmatimonadetes	MD2902-B12	uncultured bacterium	Unclassified	Unclassified	0	0	0	0	0	0.14926	0	0	0	0	0	0
Bacteria	Gemmatimonadetes	S0134 terrestrial group	uncultured Gemmatimonadetes bacterium	Unclassified	Unclassified	0	0	0	0	0	0	0	0	0.170631	0.610447	0	0
Bacteria	Gracilibacteria	Unclassified	Unclassified	Unclassified	Unclassified	0	0	0	0.306319	0.115023	0.0645448	0	0	0	0	0	0
Bacteria	Gracilibacteria	uncultured bacterium	Unclassified	Unclassified	Unclassified	0.0349314	0	0.185778	0	0	0.0564767	0	0	0	0	0	0
Bacteria	Gracilibacteria	uncultured Compostimonas sp.	Unclassified	Unclassified	Unclassified	0	0	0.0619259	0.385087	0	0.0484086	0	0	0	0	0	0
Bacteria	Gracilibacteria	uncultured organism	Unclassified	Unclassified	Unclassified	0	0	0	0	0.134194	0.0201702	0	0	0	0	0	0
Bacteria	Gracilibacteria	uncultured sediment bacterium	Unclassified	Unclassified	Unclassified	0	0	0	0.0612638	0	0	0	0	0	0	0	0
Bacteria	Hydrogenedentes	Unclassified	Unclassified	Unclassified	Unclassified	0	0.14402	0	0	0	0	0	0	0	0	0	0
Bacteria	Ignavibacteriae	Ignavibacteria	Ignavibacteriales	BSV26	Unclassified	0	0	0	0	0	0	0.552543	0	0	0.139531	0	0
Bacteria	Ignavibacteriae	Ignavibacteria	Ignavibacteriales	BSV26	uncultured bacterium	0	0	0	0	0	0	1.02323	0	0	0	0	0
Bacteria	Ignavibacteriae	Ignavibacteria	Ignavibacteriales	Ignavibacteriaceae	Ignavibacterium	0	0	0	0.175039	0	0	0.327433	0.141945	0	0.313944	0	0
Bacteria	Ignavibacteriae	Ignavibacteria	Ignavibacteriales	IheB3-7	Unclassified	0	0	0	0	0.127804	0.294485	0	0	0	0	0	0
Bacteria	Ignavibacteriae	Ignavibacteria	Ignavibacteriales	IheB3-7	uncultured bacterium	0.471575	0	0	0.218799	0	0	0	0	0	0	0	0
Bacteria	Ignavibacteriae	Ignavibacteria	Ignavibacteriales	PHOS-HE36	uncultured bacterium	0	0	0.681185	0	0	0.726129	0	0	0	0	0	0
Bacteria	Ignavibacteriae	Ignavibacteria	Ignavibacteriales	Unclassified	Unclassified	0	0	0.505728	0.350079	0	0	0	0	0	0	0	0
Bacteria	KSB3 (Modulibacteria)	Unclassified	Unclassified	Unclassified	Unclassified	0	0	0	0	0	0.270281	0	0	0	0	0	0
Bacteria	Latescibacteria	Ambiguous_taxa	Unclassified	Unclassified	Unclassified	0	0	0	0	0	0.213805	0	0.695529	1.30483	0.959274	0	0
Bacteria	Latescibacteria	Unclassified	Unclassified	Unclassified	Unclassified	0	0.0814026	0	0	0.402582	0	0.153484	0.163236	0.110409	0.270341	0	0
Bacteria	Latescibacteria	uncultured bacterium	Unclassified	Unclassified	Unclassified	0	0	0	0	0	0	0	0.617459	0	0.566844	0	0
Bacteria	Latescibacteria	uncultured Bacteroidetes bacterium	Unclassified	Unclassified	Unclassified	0	0	0	0	0	0.197668	0	0	0	0	0	0
Bacteria	Latescibacteria	uncultured Latescibacteria bacterium	Unclassified	Unclassified	Unclassified	0.454109	0.313087	0.639901	0	0	0.233975	0.706027	0.489709	0	0.0959274	0	0
Bacteria	Latescibacteria	uncultured organism	Unclassified	Unclassified	Unclassified	0.0960615	0.112711	0.567654	0.463854	0	0	0	0	0	0	0	0
Bacteria	Latescibacteria	uncultured planctomycete	Unclassified	Unclassified	Unclassified	0	0	0	0	0	0.145226	0	0	0	0	0	0
Bacteria	Latescibacteria	uncultured soil bacterium	Unclassified	Unclassified	Unclassified	0	0	0.175457	0	0	0.153294	0	0	0	0	0	0
Bacteria	Lentisphaerae	Lentisphaeria	Lentisphaerales	Lentisphaeraceae	Lentisphaera	0.06113	0	0	0	0	0	0	0	0	0	0	0
Bacteria	Lentisphaerae	Lentisphaeria	Victivallales	Arctic95B-14	uncultured bacterium	0.06113	0	0	0	0	0	0	0	0	0	0	0
Bacteria	Lentisphaerae	Lentisphaeria	Victivallales	BD2-3	uncultured bacterium	0	0	0	0	0.313119	0	0	0	0	0	0	0
Bacteria	Lentisphaerae	Oligosphaeria	Oligosphaerales	MVP-94	uncultured Lentisphaerae bacterium	0	0	0	0	0.210876	0	0	0	0	0	0	0
Bacteria	Lentisphaerae	Oligosphaeria	P.palmC41	uncultured bacterium	Unclassified	0	0	0.598617	0	0	0	0	0	0	0	0	0
Bacteria	Lentisphaerae	Oligosphaeria	SS1-B-02-17	uncultured bacterium	Unclassified	0	0.0375704	0	0.0612638	0	0	0	0	0	0	0	0
Bacteria	Lentisphaerae	Unclassified	Unclassified	Unclassified	Unclassified	0	0	0	0	0.0127804	0	0	0	0	0	0	0
Bacteria	Marinimicrobia (SAR406 clade)	uncultured organism	Unclassified	Unclassified	Unclassified	0	0	0	0	0.274778	0	0	0	0	0	0	0
Bacteria	Microgenomates	Candidatus Beckwithbacteria	uncultured bacterium	Unclassified	Unclassified	0	0	0.113531	0	0	0	0	0	0	0	0	0
Bacteria	Microgenomates	Candidatus Collierbacteria	uncultured bacterium	Unclassified	Unclassified	0	0	0	0.0612638	0	0	0	0	0	0	0	0
Bacteria	Microgenomates	Candidatus Pacebacteria	Unclassified	Unclassified	Unclassified	0	0	0.134173	0.481358	0	0	0	0	0	0	0	0
Bacteria	Microgenomates	Candidatus Woesebacteria	uncultured bacterium	Unclassified	Unclassified	0	0	0.0825679	0	0	0.0201702	0	0.0425834	0	0.0348827	0	0
Bacteria	Microgenomates	Unclassified	Unclassified	Unclassified	Unclassified	0	0	0	0	0	0.0363064	0	0	0	0	0	0
Bacteria	Microgenomates	uncultured bacterium	Unclassified	Unclassified	Unclassified	0	0	0	0	0	0	0	0.092264	0	0	0	0
Bacteria	Microgenomates	uncultured sediment bacterium	Unclassified	Unclassified	Unclassified	0	0	0	0	0.0894626	0.0322724	0	0	0	0	0	0
Bacteria	Nitrospinae	Belgica2005-10-ZG-3	uncultured bacterium	Unclassified	Unclassified	0	0	0	0	0	0.084715	0	0	0	0	0	0
Bacteria	Nitrospinae	MD2898-B26	uncultured bacterium	Unclassified	Unclassified	0	0.0876644	0	0	0	0	0	0	0	0	0	0
Bacteria	Nitrospinae	Nitrospinia	Nitrospinales	Nitrospinaceae	Nitrospina	0.812156	0.613651	0	0	0	0	0	0	0	0	0	0
Bacteria	Nitrospirae	Nitrospira	Nitrospirales	0319-6A21	Unclassified	0	0	0	0	0	0	0	0	0	0.523241	0	0
Bacteria	Nitrospirae	Nitrospira	Nitrospirales	0319-6A21	uncultured bacterium	0	0	0	0	0	0	0.235342	0.319375	0.687544	0	0	0
Bacteria	Nitrospirae	Nitrospira	Nitrospirales	Nitrospiraceae	Leptospirillum	0	0	0	0	0	0	0	0	0	0	0.212863	0
Bacteria	Nitrospirae	Nitrospira	Nitrospirales	Nitrospiraceae	Nitrospira	1.79024	1.40889	0	0	0	1.22232	2.61946	0.674237	2.15798	1.48252	0	0
Bacteria	Nitrospirae	Nitrospira	Nitrospirales	Nitrospiraceae	uncultured	0	0	0	0	0.134194	0.605107	0	0	0	0	0	0
Bacteria	Omnitrophica	Ambiguous_taxa	Unclassified	Unclassified	Unclassified	0.0349314	0	0	0	0.204486	0.407439	0	0.0141945	0	0	0	0
Bacteria	Omnitrophica	Omnitrophica Incertae Sedis	Unknown Order	Unknown Family	Candidatus Omnitrophus	0	0	0	0	0	0.100851	0	0	0.225836	0	0	0
Bacteria	Omnitrophica	Unclassified	Unclassified	Unclassified	Unclassified	0	0.112711	0	0.297567	0.0511215	0.088749	0	0	0.607247	0	0	0
Bacteria	Omnitrophica	uncultured bacterium	Unclassified	Unclassified	Unclassified	0	0	0	0	0.0447313	0.141192	0	0	0	0	0	0
Bacteria	Omnitrophica	uncultured deep-sea bacterium	Unclassified	Unclassified	Unclassified	0.296917	0.125235	0	0.0962717	0	0.161362	0	0	0	0	0	0
Bacteria	Omnitrophica	uncultured Omnitrophica bacterium	Unclassified	Unclassified	Unclassified	0	0	0	0	0.159755	0.29852	0	0	0	0	0	0
Bacteria	Omnitrophica	uncultured organism	Unclassified	Unclassified	Unclassified	0	0	0	0.13128	0.0830724	0	0	0	0	0	0	0
Bacteria	Omnitrophica	uncultured Verrucomicrobia bacterium	Unclassified	Unclassified	Unclassified	0	0	0	0	0	0.427609	0	0	0	0	0	0
Bacteria	Parcubacteria	Candidatus Azambacteria	Unclassified	Unclassified	Unclassified	0	0	0	0	0	0	0.194413	0	0	0	0	0
Bacteria	Parcubacteria	Candidatus Campbellbacteria	uncultured bacterium	Unclassified	Unclassified	0.0261986	0	0	0.210047	0.0191706	0	0	0	0	0	0	0
Bacteria	Parcubacteria	Candidatus Falkowbacteria	Unclassified	Unclassified	Unclassified	0	0	0	0	0	0.0766469	0	0	0	0	0	0
Bacteria	Parcubacteria	Candidatus Magasanikbacteria	uncultured bacterium	Unclassified	Unclassified	0	0	0	0	0	0.00806809	0	0.0283889	0	0	0	0
Bacteria	Parcubacteria	Candidatus Moranbacteria	uncultured bacterium	Unclassified	Unclassified	0	0	0.268346	2.70436	0.134194	0.177498	0	0	0	0	0	0
Bacteria	Parcubacteria	Candidatus Nomurabacteria	uncultured bacterium	Unclassified	Unclassified	0	0	0	0	0	0.141192	0	0	0	0	0	0
Bacteria	Parcubacteria	Unclassified	Unclassified	Unclassified	Unclassified	0	0.0375704	0	0.402591	0.0319509	0	0	0	0.260966	0.0610447	0	0
Bacteria	Parcubacteria	uncultured bacterium	Unclassified	Unclassified	Unclassified	0.18339	0	0	0	0	0.0201702	0	0	0	0	0	0
Bacteria	Parcubacteria	uncultured deep-sea bacterium	Unclassified	Unclassified	Unclassified	0	0	0	0	0	0	0	0.0354862	0.0451671	0	0	0
Bacteria	Parcubacteria	uncultured organism	Unclassified	Unclassified	Unclassified	0	0	0	0.0787677	0	0	0	0	0	0	0	0
Bacteria	PAUC34f	Ambiguous_taxa	Unclassified	Unclassified	Unclassified	0	0.0939261	0	0	0	0	0	0	0	0	0	0
Bacteria	PAUC34f	uncultured bacterium	Unclassified	Unclassified	Unclassified	0	0.125235	0	0	0	0	0	0	0	0	0	0
Bacteria	PAUC34f	uncultured Deferribacteres bacterium	Unclassified	Unclassified	Unclassified	0	0	0.0412839	0.0525118	0	0	0	0	0	0	0	0
Bacteria	PAUC34f	uncultured delta proteobacterium	Unclassified	Unclassified	Unclassified	0	0	0	0	0	0	0	0	0.0853157	0	0	0
Bacteria	PAUC34f	uncultured organism	Unclassified	Unclassified	Unclassified	0.139726	0	0	0	0	0	0	0	0	0	0	0
Bacteria	Peregrinibacteria	Candidatus Peribacteria	uncultured Microgenomates group bacterium	Unclassified	Unclassified	0	0	0	0.0262559	0	0	0	0	0	0	0	0
Bacteria	Peregrinibacteria	Unclassified	Unclassified	Unclassified	Unclassified	0	0	0	0.288815	0.0958528	0	0	0	0	0	0	0
Bacteria	Peregrinibacteria	uncultured bacterium	Unclassified	Unclassified	Unclassified	0	0	0.557333	0.385087	0.287558	0.193634	0	0	0	0	0	0
Bacteria	Planctomycetes	028H05-P-BN-P5	uncultured bacterium	Unclassified	Unclassified	0.12226	0	0	0	0	0	0	0	0	0	0	0
Bacteria	Planctomycetes	BD7-11	uncultured bacterium	Unclassified	Unclassified	0.0873286	0.118973	0.020642	0	0	0	0	0.0851668	0	0	0	0
Bacteria	Planctomycetes	BD7-11	uncultured organism	Unclassified	Unclassified	0	0	0.0928888	0	0	0	0	0	0	0	0	0
Bacteria	Planctomycetes	BD7-11	uncultured planctomycete	Unclassified	Unclassified	0	0	0	0	0	0	0.0613936	0.191625	0.271003	0	0	0
Bacteria	Planctomycetes	OM190	Unclassified	Unclassified	Unclassified	0.777225	0.814026	0	0	0	0	0.859511	0	0.321188	0	0.0760225	0
Bacteria	Planctomycetes	OM190	uncultured deep-sea bacterium	Unclassified	Unclassified	0	0	0	0.0962717	0	0.0927831	0	0	0	0	0	0
Bacteria	Planctomycetes	OM190	uncultured Planctomycetaceae bacterium	Unclassified	Unclassified	0	0.294302	0	0	0	0	0	0	0	0	0	0
Bacteria	Planctomycetes	OM190	uncultured Planctomycetales bacterium	Unclassified	Unclassified	0.401712	0.551033	0	0	0	0	0	0	0	0	0	0
Bacteria	Planctomycetes	Phycisphaerae	062DZ93 hypersaline microbial mat group	uncultured organism	Unclassified	0	0	0	0.175039	0	0	0	0	0	0	0	0
Bacteria	Planctomycetes	Phycisphaerae	C86	uncultured bacterium	Unclassified	0	0	0	0	0	0.0927831	0	0	0	0	0	0
Bacteria	Planctomycetes	Phycisphaerae	CCM11a	Unclassified	Unclassified	0.165924	0	0	0	0	0.137158	0	0.0851668	0	0	0	0
Bacteria	Planctomycetes	Phycisphaerae	CCM11a	uncultured bacterium	Unclassified	0	0.219161	0.0619259	0	0.070292	0	0	0	0	0.026162	0	0
Bacteria	Planctomycetes	Phycisphaerae	CCM11a	uncultured planctomycete	Unclassified	0	0.0688791	0	0	0	0.133124	0	0	0	0	0	0
Bacteria	Planctomycetes	Phycisphaerae	ML-A-10	uncultured organism	Unclassified	0	0	0	0	0.166145	0	0	0	0	0	0	0
Bacteria	Planctomycetes	Phycisphaerae	mle1-8	Unclassified	Unclassified	0	0	0.52637	0.428846	0	0	0	0	0	0	0	0
Bacteria	Planctomycetes	Phycisphaerae	mle1-8	uncultured bacterium	Unclassified	0	0	0	0	0.33229	0.322724	0	0.170334	0.28104	0	0	0
Bacteria	Planctomycetes	Phycisphaerae	mle1-8	uncultured organism	Unclassified	0	0	0.154815	0	0.121414	0	0	0	0	0	0	0
Bacteria	Planctomycetes	Phycisphaerae	MSB-3A7 sediment group	uncultured bacterium	Unclassified	0	0	0	0	0.364241	0	0	0	0	0	0	0
Bacteria	Planctomycetes	Phycisphaerae	MSBL9	uncultured planctomycete	Unclassified	0	0	0	0	0.185315	0	0	0	0	0	0	0
Bacteria	Planctomycetes	Phycisphaerae	Phycisphaerales	AKAU3564 sediment group	uncultured planctomycete	0	0	0	0	0	0.29852	0	0	0	0	0	0
Bacteria	Planctomycetes	Phycisphaerae	Phycisphaerales	Phycisphaeraceae	AKYG587	0	0	0	0	0	0	0.347897	0.440028	0.531968	0.64533	0	0
Bacteria	Planctomycetes	Phycisphaerae	Phycisphaerales	Phycisphaeraceae	CL500-3	0	0	0	0	0	0	0	0.276792	0.31617	0	0	0
Bacteria	Planctomycetes	Phycisphaerae	Phycisphaerales	Phycisphaeraceae	Phycisphaera	0	0	0	0	0	0	0.173949	0.319375	0.326207	0	0	0
Bacteria	Planctomycetes	Phycisphaerae	Phycisphaerales	Phycisphaeraceae	SM1A02	0.209589	0.162805	0	0	0	0.33886	0.214878	0.149042	0.496838	0.191855	0	0
Bacteria	Planctomycetes	Phycisphaerae	Phycisphaerales	Phycisphaeraceae	Unclassified	0	0	0.0928888	0	0	0	0	0	0	0	0	0
Bacteria	Planctomycetes	Phycisphaerae	Phycisphaerales	Phycisphaeraceae	uncultured	0.768492	0.381966	0.165136	0	0	0	0	0	0.07026	0	0	0
Bacteria	Planctomycetes	Phycisphaerae	Phycisphaerales	Phycisphaeraceae	Urania-1B-19 marine sediment group	0.209589	0.350657	0	0	0	0.16943	0	0	0	0	0	0
Bacteria	Planctomycetes	Phycisphaerae	Phycisphaerales	Unclassified	Unclassified	0	0	0.330271	0	0	1.17794	0	0	0	0	0	0
Bacteria	Planctomycetes	Phycisphaerae	Phycisphaerales	uncultured organism	Unclassified	0	0	0	0.0962717	0	0	0	0	0	0	0	0
Bacteria	Planctomycetes	Phycisphaerae	S-70	Ambiguous_taxa	Unclassified	0	0.112711	0	0	0	0	0	0	0	0	0	0
Bacteria	Planctomycetes	Phycisphaerae	S-70	Unclassified	Unclassified	0.0436643	0	0	0	0	0	0	0	0	0	0	0
Bacteria	Planctomycetes	Phycisphaerae	S-70	uncultured bacterium	Unclassified	0	0	0	0	0	0	0	0	0.722674	0	0	0
Bacteria	Planctomycetes	Phycisphaerae	S-70	uncultured planctomycete	Unclassified	0	0	0	0	0	0	0.368362	0	0.471745	0.313944	0	0
Bacteria	Planctomycetes	Phycisphaerae	SHA-43	uncultured bacterium	Unclassified	0	0	0	0	0.0639018	0	0	0	0	0	0	0
Bacteria	Planctomycetes	Phycisphaerae	SHA-43	uncultured organism	Unclassified	0	0	0	0	0	0.0605107	0	0	0	0	0	0
Bacteria	Planctomycetes	Phycisphaerae	Tepidisphaerales	Tepidisphaeraceae	Unclassified	0	0	0	0	0	0	0.634401	0.340667	0.336244	1.27322	0	0
Bacteria	Planctomycetes	Phycisphaerae	Tepidisphaerales	Tepidisphaeraceae	uncultured bacterium	0	0	0	0	0	0	0	0	0.42156	0	0	0
Bacteria	Planctomycetes	Pla3 lineage	Unclassified	Unclassified	Unclassified	0	0	0	0	0	0	0	0	0.170631	0	0	0
Bacteria	Planctomycetes	Pla3 lineage	uncultured bacterium	Unclassified	Unclassified	0.148459	0	0	0	0	0	0	0	0.301114	0	0	0
Bacteria	Planctomycetes	Pla3 lineage	uncultured organism	Unclassified	Unclassified	0	0	0	0	0	0.104885	0	0	0	0	0	0
Bacteria	Planctomycetes	Pla3 lineage	uncultured planctomycete	Unclassified	Unclassified	0	0.281778	0	0	0	0	0	0	0	0	0	0
Bacteria	Planctomycetes	Pla4 lineage	Unclassified	Unclassified	Unclassified	0	0	0	0	0	0.439711	0	0.141945	0.125464	0	0	0
Bacteria	Planctomycetes	Pla4 lineage	uncultured bacterium	Unclassified	Unclassified	0	0	0	0	0	0	0	0	0.110409	0	0	0
Bacteria	Planctomycetes	Pla4 lineage	uncultured organism	Unclassified	Unclassified	0	0	0.371555	0.551374	0	0	0	0	0	0	0	0
Bacteria	Planctomycetes	Pla4 lineage	uncultured planctomycete	Unclassified	Unclassified	0	0	0	0	0	0	0	0	0.10539	0	0	0
Bacteria	Planctomycetes	Planctomycetacia	Brocadiales	Brocadiaceae	Candidatus Scalindua	0	0.125235	0	0	0	0	0	0	0	0	0	0
Bacteria	Planctomycetes	Planctomycetacia	Brocadiales	Brocadiaceae	PB79	0	0	0	0	0	0.0645448	0	0	0	0	0	0
Bacteria	Planctomycetes	Planctomycetacia	Brocadiales	Brocadiaceae	uncultured planctomycete	0	0	0	0	0	0.0242043	0	0	0	0	0	0
Bacteria	Planctomycetes	Planctomycetacia	Planctomycetales	Planctomycetaceae	Blastopirellula	0	0.619912	0	0	0	0	0.879975	0.248403	0.271003	0.418592	0	0
Bacteria	Planctomycetes	Planctomycetacia	Planctomycetales	Planctomycetaceae	Bythopirellula	0	0	0	0	0	0.0927831	0	0	0	0	0	0
Bacteria	Planctomycetes	Planctomycetacia	Planctomycetales	Planctomycetaceae	Gemmata	0	0	0	0	0.0319509	0	1.51438	0.887154	0.757804	0.38371	0	0
Bacteria	Planctomycetes	Planctomycetacia	Planctomycetales	Planctomycetaceae	Isosphaera	0	0	0	0	0	0	0.798117	0.390348	0	0.64533	0	0
Bacteria	Planctomycetes	Planctomycetacia	Planctomycetales	Planctomycetaceae	Pir4 lineage	0.0174657	0	0	0	0	0.201702	0.419523	0	0	0.0872068	0	0
Bacteria	Planctomycetes	Planctomycetacia	Planctomycetales	Planctomycetaceae	Pirellula	0	0	0	0	0	0.282383	0	0.354862	0.0802971	0.313944	0	0
Bacteria	Planctomycetes	Planctomycetacia	Planctomycetales	Planctomycetaceae	Planctomyces	0.392979	0.463369	0	0	0.0894626	0	0.35813	0.276792	0.406504	0.566844	0	0
Bacteria	Planctomycetes	Planctomycetacia	Planctomycetales	Planctomycetaceae	Rhodopirellula	1.38853	0.450845	0	0	0	0	0	0	0	0	0	0
Bacteria	Planctomycetes	Planctomycetacia	Planctomycetales	Planctomycetaceae	Roseimaritima	0	0	0	0	0.230047	0	0	0	0	0	0	0
Bacteria	Planctomycetes	Planctomycetacia	Planctomycetales	Planctomycetaceae	Rubripirellula	0	0.300564	0	0	0	0	0	0	0	0	0	0
Bacteria	Planctomycetes	Planctomycetacia	Planctomycetales	Planctomycetaceae	Singulisphaera	0	0	0	0	0	0	0	0	0	0	0	0.724055
Bacteria	Planctomycetes	Planctomycetacia	Planctomycetales	Planctomycetaceae	Unclassified	0.0785958	0	0	0	0	0	1.83158	0.0780696	0.411523	0.0436034	0	0
Bacteria	Planctomycetes	Planctomycetacia	Planctomycetales	Planctomycetaceae	uncultured	0.759759	0.632436	0.123852	0	0	0	4.79894	4.71966	2.39386	4.16848	0	0.134084
Bacteria	Planctomycetes	Unclassified	Unclassified	Unclassified	Unclassified	0.18339	0.369443	0	0.113776	0.146974	0	0	0	0.135501	0	0	0
Bacteria	Planctomycetes	vadinHA49	Unclassified	Unclassified	Unclassified	0	0	0	0	0.0447313	0	0	0.0993612	0	0	0	0
Bacteria	Planctomycetes	vadinHA49	uncultured bacterium	Unclassified	Unclassified	0.200856	0.175329	0	0	0	0.395337	0.13302	0.0993612	0.115427	0	0	0
Bacteria	Proteobacteria	Alphaproteobacteria	Alphaproteobacteria Incertae Sedis	uncultured	uncultured alpha proteobacterium	0	0	0	0.428846	0	0	0	0	0	0	0	0
Bacteria	Proteobacteria	Alphaproteobacteria	Alphaproteobacteria Incertae Sedis	uncultured	uncultured bacterium	0	0	0	0	0	0.0726129	0	0	0	0	0	0
Bacteria	Proteobacteria	Alphaproteobacteria	Alphaproteobacteria Incertae Sedis	Unknown Family	uncultured	0.314383	0.262993	0.557333	0.752669	0.587897	0.217839	0	0	0	0	0	0
Bacteria	Proteobacteria	Alphaproteobacteria	Caulobacterales	Caulobacteraceae	Brevundimonas	0	0	0	0	0	0.0282383	1.01299	0	0	0.64533	0	0
Bacteria	Proteobacteria	Alphaproteobacteria	Caulobacterales	Hyphomonadaceae	Hirschia	0	0	0	0	0	0	0.276271	0	0.260966	0	0	0
Bacteria	Proteobacteria	Alphaproteobacteria	Caulobacterales	Hyphomonadaceae	Hyphomonas	0	0	0	0	0.562336	0	0	0	0	0	0	0
Bacteria	Proteobacteria	Alphaproteobacteria	Caulobacterales	Hyphomonadaceae	Unclassified	0	0	0	0	0.159755	0	0	0	0	0	0	0
Bacteria	Proteobacteria	Alphaproteobacteria	Caulobacterales	Hyphomonadaceae	uncultured	0	0	0	0	0.134194	0	0	0	0	0	0	0
Bacteria	Proteobacteria	Alphaproteobacteria	Caulobacterales	Hyphomonadaceae	Woodsholea	0	0	0	0	0	0	0	0.752307	0.165613	0.409872	0	0
Bacteria	Proteobacteria	Alphaproteobacteria	Emcibacterales	Emcibacteraceae	Emcibacter	0	0	0	0	0.319509	0	0	0	0	0	0	0
Bacteria	Proteobacteria	Alphaproteobacteria	Kordiimonadales	Kordiimonadaceae	Kordiimonas	0	0.369443	0	0	0	0	0	0	0	0	0	0
Bacteria	Proteobacteria	Alphaproteobacteria	Parvularculales	Parvularculaceae	Amphiplicatus	0	0	0	0	0	0	0	0.290987	0.401485	0.418592	0	0
Bacteria	Proteobacteria	Alphaproteobacteria	Parvularculales	Parvularculaceae	uncultured bacterium	0.558903	0.313087	0.547012	0	0	0.588971	0	0	0	0	0	0
Bacteria	Proteobacteria	Alphaproteobacteria	Parvularculales	Parvularculaceae	uncultured organism	0.401712	0.294302	0	0	0	0	0	0	0	0	0	0
Bacteria	Proteobacteria	Alphaproteobacteria	Rhizobiales	A0839	Unclassified	0	0	0	0	0	0	0	0	0.250928	0	0	0
Bacteria	Proteobacteria	Alphaproteobacteria	Rhizobiales	A0839	uncultured bacterium	0	0	0	0	0	0	0.818582	0	0	0.139531	0	0
Bacteria	Proteobacteria	Alphaproteobacteria	Rhizobiales	Aurantimonadaceae	Unclassified	0	0	0.619259	0.44635	0	0	0	0	0	0	0	0
Bacteria	Proteobacteria	Alphaproteobacteria	Rhizobiales	Bradyrhizobiaceae	Bradyrhizobium	0	0	0	0	0	0	0	0	0.155576	0.436034	0	0
Bacteria	Proteobacteria	Alphaproteobacteria	Rhizobiales	Hyphomicrobiaceae	Devosia	0	0	0	0	0	0	0	0	0.441634	0	0	0
Bacteria	Proteobacteria	Alphaproteobacteria	Rhizobiales	Hyphomicrobiaceae	Maritalea	0	0.262993	0	0	0	0	0	0	0	0	0	0
Bacteria	Proteobacteria	Alphaproteobacteria	Rhizobiales	Hyphomicrobiaceae	Pedomicrobium	0	0	0	0	0	0	0	0	0.190706	0	0	0
Bacteria	Proteobacteria	Alphaproteobacteria	Rhizobiales	Hyphomicrobiaceae	Pelagibacterium	0	0	1.19723	0.551374	0.568726	0	0	0	0	0	0	0
Bacteria	Proteobacteria	Alphaproteobacteria	Rhizobiales	Hyphomicrobiaceae	Unclassified	0	0	0	0	0	0	0.511614	0.695529	0	0.51452	0	0
Bacteria	Proteobacteria	Alphaproteobacteria	Rhizobiales	OCS116 clade	Unclassified	0	0	0.288988	0.53387	0	0	0	0	0	0	0	0
Bacteria	Proteobacteria	Alphaproteobacteria	Rhizobiales	Phyllobacteriaceae	Hoeflea	0	0	0	0	0.281168	0	0	0	0	0	0	0
Bacteria	Proteobacteria	Alphaproteobacteria	Rhizobiales	Phyllobacteriaceae	Mesorhizobium	0	0	0	0	0	0	0	0	0.461708	0	0	0
Bacteria	Proteobacteria	Alphaproteobacteria	Rhizobiales	Rhizobiaceae	Unclassified	0	0	0	0	0	0	0	0	0	0.13081	0	0
Bacteria	Proteobacteria	Alphaproteobacteria	Rhizobiales	Rhizobiales Incertae Sedis	Phreatobacter	0	0	0	0	0	0	0	0	0	0.200576	0	0
Bacteria	Proteobacteria	Alphaproteobacteria	Rhizobiales	Rhodobiaceae	Parvibaculum	0	0	0.743111	0	0	0	0	0	0	0.287782	0	0
Bacteria	Proteobacteria	Alphaproteobacteria	Rhizobiales	Rhodobiaceae	uncultured	0	0.638698	0	0	0	0	0.869743	0.631654	0	0	0	0
Bacteria	Proteobacteria	Alphaproteobacteria	Rhizobiales	Roseiarcaceae	Roseiarcus	0	0	0	0	0	0	0.593472	0.489709	0	0	0	0
Bacteria	Proteobacteria	Alphaproteobacteria	Rhizobiales	Unclassified	Unclassified	0	0.626174	0.485086	0.638894	1.4953	0.266247	0	0	0	0.749978	0	0
Bacteria	Proteobacteria	Alphaproteobacteria	Rhizobiales	Xanthobacteraceae	Pseudolabrys	0	0	0	0	0	0	0	0.489709	0	0	0	0
Bacteria	Proteobacteria	Alphaproteobacteria	Rhodobacterales	Rhodobacteraceae	Defluviimonas	0	0.500939	0	0	0	0	0	0	0	0	0	0
Bacteria	Proteobacteria	Alphaproteobacteria	Rhodobacterales	Rhodobacteraceae	Unclassified	1.16147	1.13964	1.29012	1.68038	0.230047	0.411473	0	0	0.250928	0	0.653794	0
Bacteria	Proteobacteria	Alphaproteobacteria	Rhodospirillales	Acetobacteraceae	Acidicaldus	0	0	0	0	0	0	0	0.511001	0.0953528	0	0	0
Bacteria	Proteobacteria	Alphaproteobacteria	Rhodospirillales	Acetobacteraceae	Acidiphilium	0	0	0	0	0	0	0	0	0	0	0	0.992223
Bacteria	Proteobacteria	Alphaproteobacteria	Rhodospirillales	Acetobacteraceae	Unclassified	0	0	0	0	0	0	0.613936	0.319375	0	0	0	0.375436
Bacteria	Proteobacteria	Alphaproteobacteria	Rhodospirillales	Acetobacteraceae	uncultured	0	0	0	0	0	0	0	0	0	0	0.760225	2.11853
Bacteria	Proteobacteria	Alphaproteobacteria	Rhodospirillales	AT-s3-44	Unclassified	0.454109	1.0958	0	0	0	0	0	0	0	0	0	0
Bacteria	Proteobacteria	Alphaproteobacteria	Rhodospirillales	AT-s3-44	uncultured alpha proteobacterium	0.296917	0	0	0	0	0.278349	0	0	0	0	0	0
Bacteria	Proteobacteria	Alphaproteobacteria	Rhodospirillales	AT-s3-44	uncultured bacterium	0	0	0	0	0	0.411473	0	0	0	0	0	0
Bacteria	Proteobacteria	Alphaproteobacteria	Rhodospirillales	B79	uncultured bacterium	0	0	0	0	0	0	0.306968	0.894251	0	0	0	0
Bacteria	Proteobacteria	Alphaproteobacteria	Rhodospirillales	DA111	Unclassified	0	0	0	0	0	0	0.419523	0.809084	0	0.505799	0	0
Bacteria	Proteobacteria	Alphaproteobacteria	Rhodospirillales	I-10	uncultured bacterium	0	0	0	0	0	0	0.22511	0	0.45669	0	0	0
Bacteria	Proteobacteria	Alphaproteobacteria	Rhodospirillales	JG37-AG-20	Unclassified	0	0	0	0	0	0	1.2995	0.887154	0.371374	1.41275	0	0
Bacteria	Proteobacteria	Alphaproteobacteria	Rhodospirillales	JG37-AG-20	uncultured bacterium	0	0	0	0	0	0	0.122787	0.58907	0.406504	0.51452	0	0
Bacteria	Proteobacteria	Alphaproteobacteria	Rhodospirillales	KCM-B-15	uncultured bacterium	0	0	0	0	0	0	0.890208	0.489709	0.501857	0	0	0
Bacteria	Proteobacteria	Alphaproteobacteria	Rhodospirillales	MND8	uncultured bacterium	0	0	0	0	0	0	0	0	0	0.374989	0	0
Bacteria	Proteobacteria	Alphaproteobacteria	Rhodospirillales	MSB-1E8	uncultured bacterium	0	0	0	0	0	0	0	0	0.195724	0.688933	0	0
Bacteria	Proteobacteria	Alphaproteobacteria	Rhodospirillales	Rhodospirillaceae	Ambiguous_taxa	0	0	0	0	0	0	0	0.624556	0.431597	1.15113	0	0
Bacteria	Proteobacteria	Alphaproteobacteria	Rhodospirillales	Rhodospirillaceae	Azospirillum	0	0	0	0	0	0	0	0	0	0	0.425726	0
Bacteria	Proteobacteria	Alphaproteobacteria	Rhodospirillales	Rhodospirillaceae	Defluviicoccus	0	0.294302	1.51718	0.630142	0.408972	0	0	0	0	0	0	0
Bacteria	Proteobacteria	Alphaproteobacteria	Rhodospirillales	Rhodospirillaceae	Magnetovibrio	0	0	0	0	0	0.754367	0	0	0	0	0	0
Bacteria	Proteobacteria	Alphaproteobacteria	Rhodospirillales	Rhodospirillaceae	Pelagibius	2.45393	3.28115	0	0	1.14384	0.266247	0	0	0	0	0	0
Bacteria	Proteobacteria	Alphaproteobacteria	Rhodospirillales	Rhodospirillaceae	Thalassospira	0	0	0	0	0.35146	0	0	0	0	0	0	0
Bacteria	Proteobacteria	Alphaproteobacteria	Rhodospirillales	Rhodospirillaceae	Unclassified	0.227054	0	0	0	0.434533	0.262213	0	0.454223	0	0.357548	0	0
Bacteria	Proteobacteria	Alphaproteobacteria	Rhodospirillales	Rhodospirillaceae	uncultured	5.03886	5.63557	0.268346	0	0.549556	0.476018	0	0.283889	0.195724	0.313944	0	0
Bacteria	Proteobacteria	Alphaproteobacteria	Rhodospirillales	Rhodospirillales Incertae Sedis	Candidatus Alysiosphaera	0	0	0	0	0	0	0.624169	0.475515	0.160594	0	0	0
Bacteria	Proteobacteria	Alphaproteobacteria	Rhodospirillales	Rhodospirillales Incertae Sedis	Reyranella	0	0	0	0	0	0	0.521846	0.844571	0.722674	0	0	0
Bacteria	Proteobacteria	Alphaproteobacteria	Rhodospirillales	Unclassified	Unclassified	0.113527	0	0	0	0	0.157328	0.306968	0.71682	0.38643	0.941833	0	0
Bacteria	Proteobacteria	Alphaproteobacteria	Rickettsiales	[Caedibacter] caryophilus group	Ambiguous_taxa	0	0	0	0	0	0	0	0	0.336244	0	0	0
Bacteria	Proteobacteria	Alphaproteobacteria	Rickettsiales	[Caedibacter] caryophilus group	uncultured bacterium	0	0	0	0	0	0	0	0	0.536987	0	0	0
Bacteria	Proteobacteria	Alphaproteobacteria	Rickettsiales	EF100-94H03	Unclassified	0	0	0	0	0	0	0	0.290987	0.511894	0	0	0
Bacteria	Proteobacteria	Alphaproteobacteria	Rickettsiales	Holosporaceae	uncultured	0	0	0.577975	0	0.140584	0	0.439988	0.369056	0	0.505799	0	0.482703
Bacteria	Proteobacteria	Alphaproteobacteria	Rickettsiales	LWSR-14	Unclassified	0	0	0	0	0	0	0	0	0.341263	0	0	0
Bacteria	Proteobacteria	Alphaproteobacteria	Rickettsiales	Mitochondria	Unclassified	0	0	0	0	0	0	0	0	0	0.38371	0	0
Bacteria	Proteobacteria	Alphaproteobacteria	Rickettsiales	Rickettsiaceae	Rickettsia	0	0	0	0	0	0	0	0	0	0	0.866657	0
Bacteria	Proteobacteria	Alphaproteobacteria	Rickettsiales	Rickettsiaceae	uncultured	0	0.388228	0	0	0.140584	0	0	0	0.130483	0	1.36841	0
Bacteria	Proteobacteria	Alphaproteobacteria	Rickettsiales	Rickettsiales Incertae Sedis	Candidatus Defluviella	0	0	0.020642	0	0	0	0	0	0	0	0	0
Bacteria	Proteobacteria	Alphaproteobacteria	Rickettsiales	Rickettsiales Incertae Sedis	Candidatus Odyssella	0	0	0	0	0	0	0	0	0	0	0.699407	0
Bacteria	Proteobacteria	Alphaproteobacteria	Rickettsiales	Rickettsiales Incertae Sedis	uncultured	0	0	0	0	0	0	0	0	0.17565	0	0	0
Bacteria	Proteobacteria	Alphaproteobacteria	Rickettsiales	SM2D12	Unclassified	0	0	0	0	0	0	0	0.149042	0.110409	0	0	0
Bacteria	Proteobacteria	Alphaproteobacteria	Rickettsiales	SM2D12	uncultured soil bacterium	0	0	0	0	0	0	0.204645	0	0	0	0	0
Bacteria	Proteobacteria	Alphaproteobacteria	Rickettsiales	Unclassified	Unclassified	0.55017	0	0	0	0.242827	0	0	0	0	0	0	0
Bacteria	Proteobacteria	Alphaproteobacteria	S26-47	uncultured bacterium	Unclassified	1.33613	0.356919	0	0	0	0	0	0	0	0	0	0
Bacteria	Proteobacteria	Alphaproteobacteria	Sneathiellales	Sneathiellaceae	Sneathiella	0	0	0.485086	0	0.511215	0	0	0	0	0	0	0
Bacteria	Proteobacteria	Alphaproteobacteria	Sphingomonadales	Sphingomonadaceae	Novosphingobium	0	0	0	0	0	0	0	0.574876	0	0	0	0
Bacteria	Proteobacteria	Alphaproteobacteria	Sphingomonadales	Sphingomonadaceae	Sphingomonas	0	0	0	0	0	0	0	0	1.17936	0.200576	0	0
Bacteria	Proteobacteria	Alphaproteobacteria	Sphingomonadales	Sphingomonadaceae	Sphingopyxis	0	0	0	0	0	0	0.378594	0	0	0.436034	0	0
Bacteria	Proteobacteria	Alphaproteobacteria	Sphingomonadales	Sphingomonadaceae	Sphingorhabdus	0	0	0	0	0.472874	0	0	0	0	0	0	0
Bacteria	Proteobacteria	Alphaproteobacteria	Sphingomonadales	Sphingomonadaceae	Unclassified	0	0	0	0	0	0	0	0	0.59721	0	0	0
Bacteria	Proteobacteria	Alphaproteobacteria	ss1-B-07-44	Unclassified	Unclassified	0	0	0	0	0.33868	0	0	0	0	0	0	0
Bacteria	Proteobacteria	Alphaproteobacteria	Unclassified	Unclassified	Unclassified	0.296917	0.0939261	0.650222	0	0.907406	0.411473	0.204645	0.0283889	0.0200743	0	0	0
Bacteria	Proteobacteria	Betaproteobacteria	B1-7BS	uncultured bacterium	Unclassified	0	0	0	0	0	0	0	1.10717	0.863194	0	0	0
Bacteria	Proteobacteria	Betaproteobacteria	Burkholderiales	Burkholderiaceae	Ralstonia	0	0	0	0	0	0	0	0	0	0	0.988293	0
Bacteria	Proteobacteria	Betaproteobacteria	Burkholderiales	Burkholderiales Incertae Sedis	Thiomonas	0	0	0	0	0	0.197668	0	0	0.63234	0	0	0
Bacteria	Proteobacteria	Betaproteobacteria	Burkholderiales	Comamonadaceae	Delftia	0	0	0	0.306319	0	0	0	0	0	0	0.927475	1.31403
Bacteria	Proteobacteria	Betaproteobacteria	Burkholderiales	Comamonadaceae	Hydrogenophaga	0	0.375704	0	0	0	0	0	0	0	0.741258	0	0
Bacteria	Proteobacteria	Betaproteobacteria	Burkholderiales	Comamonadaceae	Inhella	0	0	0	0	0	0	0	0	0.0602228	0	0	0
Bacteria	Proteobacteria	Betaproteobacteria	Burkholderiales	Comamonadaceae	Rhizobacter	0	0	0	0	0	0	0	0	0.230854	0	0	0
Bacteria	Proteobacteria	Betaproteobacteria	Burkholderiales	Comamonadaceae	Unclassified	0	0	0	0	0	0	1.22787	0.290987	0.612265	0.13081	0	0.455886
Bacteria	Proteobacteria	Betaproteobacteria	Hydrogenophilales	Hydrogenophilaceae	Sulfuriferula	0	0	0	0	0	0	0	0	12.0797	0.296503	0	0
Bacteria	Proteobacteria	Betaproteobacteria	Hydrogenophilales	Hydrogenophilaceae	Thiobacillus	0	0.0626174	0	0	0	0	0.695795	0.844571	0.958547	0.401151	0	0
Bacteria	Proteobacteria	Betaproteobacteria	Hydrogenophilales	Hydrogenophilaceae	uncultured	0	0.726362	0	0	0	0	0	0	0	0	0	0
Bacteria	Proteobacteria	Betaproteobacteria	Neisseriales	Neisseriaceae	uncultured	0	0	0	0	0	0	0	0	0	0	0.273681	0
Bacteria	Proteobacteria	Betaproteobacteria	Nitrosomonadales	Gallionellaceae	Unclassified	0	0	0	0	0	0	0	0.33357	0	0	0	0
Bacteria	Proteobacteria	Betaproteobacteria	Nitrosomonadales	Nitrosomonadaceae	Nitrosomonas	1.82517	0	0	0	0	0	0	0	0	0	0	0
Bacteria	Proteobacteria	Betaproteobacteria	Nitrosomonadales	Nitrosomonadaceae	Unclassified	0	0.551033	0	0	0	0	0	0	0	0	0	0
Bacteria	Proteobacteria	Betaproteobacteria	Nitrosomonadales	Nitrosomonadaceae	uncultured	0	0	0	0	0	0	1.45298	1.32009	0.31617	0.77614	0	0
Bacteria	Proteobacteria	Betaproteobacteria	SC-I-84	Unclassified	Unclassified	0	0	0	0	0	0	0	0	0	0.296503	0	0
Bacteria	Proteobacteria	Betaproteobacteria	TRA3-20	Unclassified	Unclassified	0	0	0	0	0	0	0	0	0.130483	0	0	0
Bacteria	Proteobacteria	Betaproteobacteria	Unclassified	Unclassified	Unclassified	0	0	0	0	0	0	2.09762	4.64869	1.32992	1.68309	0	0
Bacteria	Proteobacteria	Deltaproteobacteria	43F-1404R	uncultured bacterium	Unclassified	0	0	0	0	0	0	0	0	0.426578	0	0	0
Bacteria	Proteobacteria	Deltaproteobacteria	Bdellovibrionales	Bacteriovoracaceae	Halobacteriovorax	0	0.131497	0	0	0	0	0	0	0	0	0	0
Bacteria	Proteobacteria	Deltaproteobacteria	Bdellovibrionales	Bacteriovoracaceae	Peredibacter	0	0	0.712148	0.472606	0.166145	0.137158	0	0	0	0	0	0
Bacteria	Proteobacteria	Deltaproteobacteria	Bdellovibrionales	Bacteriovoracaceae	Unclassified	0	0	0	0.0612638	0	0	0	0	0	0	0	0
Bacteria	Proteobacteria	Deltaproteobacteria	Bdellovibrionales	Bacteriovoracaceae	uncultured	0	0.651221	0.288988	0	0.747652	0	0	0	0	0	0	0
Bacteria	Proteobacteria	Deltaproteobacteria	Bdellovibrionales	Bdellovibrionaceae	Bdellovibrio	0.331849	0.319349	0	0	0	0.173464	0.511614	0.390348	0	0	0	0
Bacteria	Proteobacteria	Deltaproteobacteria	Bdellovibrionales	Bdellovibrionaceae	OM27 clade	0	0	0	0	0	0.185566	0	0	0.100371	0	0	0
Bacteria	Proteobacteria	Deltaproteobacteria	Bradymonadales	uncultured bacterium	Unclassified	0.0785958	0	0	0	0	0	0	0	0	0	0	0
Bacteria	Proteobacteria	Deltaproteobacteria	Bradymonadales	uncultured delta proteobacterium	Unclassified	0	0.413275	0	0	0	0	0	0	0	0	0	0
Bacteria	Proteobacteria	Deltaproteobacteria	Desulfarculales	Desulfarculaceae	Desulfatiglans	0	0	0.877284	0.113776	0	0.262213	0	0	0	0	0	0
Bacteria	Proteobacteria	Deltaproteobacteria	Desulfarculales	Desulfarculaceae	Desulfocarbo	0	0	0.196099	0.166287	0	0	0	0	0	0	0	0
Bacteria	Proteobacteria	Deltaproteobacteria	Desulfarculales	Desulfarculaceae	uncultured	0	0	0.10321	0	0	0.0605107	0	0	0	0	0	0
Bacteria	Proteobacteria	Deltaproteobacteria	Desulfobacterales	Desulfobacteraceae	Desulfobacter	0	0	0	0	0.408972	0	0	0	0	0	0	0
Bacteria	Proteobacteria	Deltaproteobacteria	Desulfobacterales	Desulfobacteraceae	Desulfococcus	0	0	0	0	0	0.738231	0	0	0	0	0	0
Bacteria	Proteobacteria	Deltaproteobacteria	Desulfobacterales	Desulfobacteraceae	Desulfoconvexum	0	0	0	0	0	0.161362	0	0	0	0	0	0
Bacteria	Proteobacteria	Deltaproteobacteria	Desulfobacterales	Desulfobacteraceae	Desulfosarcina	0	0	1.61007	0.647646	0.33229	0.726129	0	0	0	0	0	0
Bacteria	Proteobacteria	Deltaproteobacteria	Desulfobacterales	Desulfobacteraceae	SEEP-SRB1	0	0	0	0	0	0.0403405	0	0	0	0	0	0
Bacteria	Proteobacteria	Deltaproteobacteria	Desulfobacterales	Desulfobacteraceae	Sva0081 sediment group	1.1964	0.626174	0.577975	0	0.779603	0.988342	0	0	0	0	0	0
Bacteria	Proteobacteria	Deltaproteobacteria	Desulfobacterales	Desulfobacteraceae	Unclassified	0	0	0.743111	1.3128	0	1.94844	0	0	0	0	0	0
Bacteria	Proteobacteria	Deltaproteobacteria	Desulfobacterales	Desulfobacteraceae	uncultured	0	0	0	0.428846	0	0.395337	0	0	0	0	0	0
Bacteria	Proteobacteria	Deltaproteobacteria	Desulfobacterales	Desulfobulbaceae	Desulfobulbus	0	0.0939261	0.722469	2.16174	0.377021	1.26669	0	0	0	0	0	0
Bacteria	Proteobacteria	Deltaproteobacteria	Desulfobacterales	Desulfobulbaceae	Desulfocapsa	0	0	1.02178	1.36531	0	0	0	0	0	0	0	0
Bacteria	Proteobacteria	Deltaproteobacteria	Desulfobacterales	Desulfobulbaceae	Dissulfurimicrobium	0	0	0.247704	0	0	0.205736	0	0	0	0	0	0
Bacteria	Proteobacteria	Deltaproteobacteria	Desulfobacterales	Desulfobulbaceae	MSBL7	0	0	0.547012	1.65412	0.0958528	2.55355	0	0	0	0	0	0
Bacteria	Proteobacteria	Deltaproteobacteria	Desulfobacterales	Desulfobulbaceae	Unclassified	0	0	0	1.05024	0.268388	0.411473	0	0	0	0	0	0
Bacteria	Proteobacteria	Deltaproteobacteria	Desulfobacterales	Desulfobulbaceae	uncultured	0	0	0	0	0	0.31869	0	0	0	0	0	0
Bacteria	Proteobacteria	Deltaproteobacteria	Desulfobacterales	Unclassified	Unclassified	0	0	0	0.735165	0	0	0	0	0	0	0	0
Bacteria	Proteobacteria	Deltaproteobacteria	Desulfovibrionales	Desulfovibrionaceae	Desulfovibrio	0	0	0	0	1.15023	0	0	0	0	0	0	0
Bacteria	Proteobacteria	Deltaproteobacteria	Desulfurellales	Desulfurellaceae	G55	0.24452	0.225423	0	0	0	0	0.480917	0.184528	0.265984	0	0	0
Bacteria	Proteobacteria	Deltaproteobacteria	Desulfurellales	Desulfurellaceae	H16	0	0	0	0	0	0	1.77018	2.0582	2.57453	1.87495	0	0
Bacteria	Proteobacteria	Deltaproteobacteria	Desulfuromonadales	Desulfuromonadaceae	Desulfuromonas	0	0	0	0	0.639018	0	0	0	0	0	0	0
Bacteria	Proteobacteria	Deltaproteobacteria	Desulfuromonadales	Desulfuromonadaceae	Desulfuromusa	0.12226	0.300564	0.918567	2.31927	0.849895	0.294485	0	0	0	0	0	0
Bacteria	Proteobacteria	Deltaproteobacteria	Myxococcales	bacteriap25	Unclassified	0.165924	0	0	0	0	0	0	0	0	0	0	0
Bacteria	Proteobacteria	Deltaproteobacteria	Myxococcales	BIrii41	Unclassified	0	0	0	0	0	0	0	0.361959	0	0	0	0
Bacteria	Proteobacteria	Deltaproteobacteria	Myxococcales	Haliangiaceae	Haliangium	0.270719	0.551033	0	0	0	0	0.235342	0.738112	0.627321	0.994157	0	0
Bacteria	Proteobacteria	Deltaproteobacteria	Myxococcales	MidBa8	Unclassified	0	0	0.175457	0	0	0	0	0	0	0	0	0
Bacteria	Proteobacteria	Deltaproteobacteria	Myxococcales	MidBa8	uncultured microorganism	0	0	0	0	0.300339	0	0	0	0	0	0	0
Bacteria	Proteobacteria	Deltaproteobacteria	Myxococcales	mle1-27	Unclassified	0	0	0	0	0	0	0	0	0.125464	0	0	0
Bacteria	Proteobacteria	Deltaproteobacteria	Myxococcales	Nannocystaceae	Unclassified	0	0	0	0	0	0	0	0.141945	0	0	0	0
Bacteria	Proteobacteria	Deltaproteobacteria	Myxococcales	Nannocystaceae	uncultured	0	0	0	0	0	0	0	0	0	0.279062	0	0
Bacteria	Proteobacteria	Deltaproteobacteria	Myxococcales	P3OB-42	Unclassified	0	0.219161	0	0	0	0	0	0	0	0	0	0
Bacteria	Proteobacteria	Deltaproteobacteria	Myxococcales	P3OB-42	uncultured bacterium	0	0	0	0	0	0	0	0	0.195724	0	0	0
Bacteria	Proteobacteria	Deltaproteobacteria	Myxococcales	P3OB-42	uncultured deep-sea bacterium	0	0.0125235	0	0	0	0	0	0	0	0	0	0
Bacteria	Proteobacteria	Deltaproteobacteria	Myxococcales	P3OB-42	uncultured organism	0	0	0.588296	0	0	0	0	0	0	0	0	0
Bacteria	Proteobacteria	Deltaproteobacteria	Myxococcales	Phaselicystidaceae	Phaselicystis	0	0	0.42316	0.831437	0	0	0	0	0	0	0	0
Bacteria	Proteobacteria	Deltaproteobacteria	Myxococcales	Polyangiaceae	Sorangium	0	0	0	0	0	0	0	0.489709	0.190706	0	0	0
Bacteria	Proteobacteria	Deltaproteobacteria	Myxococcales	Polyangiaceae	Unclassified	0	0	0	0	0	0	0	0	0	0.287782	0	0
Bacteria	Proteobacteria	Deltaproteobacteria	Myxococcales	PS-B29	uncultured organism	0	0	0	0.341327	0	0.431643	0	0	0	0	0	0
Bacteria	Proteobacteria	Deltaproteobacteria	Myxococcales	Sandaracinaceae	Sandaracinus	0	0	0	0	0	0	0	0	0	0.113369	0	0
Bacteria	Proteobacteria	Deltaproteobacteria	Myxococcales	Sandaracinaceae	uncultured	0.192123	0.14402	0.619259	0	0.536776	0.33886	0	0	0.0953528	0	0	0
Bacteria	Proteobacteria	Deltaproteobacteria	Myxococcales	UASB-TL25	uncultured bacterium	0.218322	0	0	0	0	0	0	0	0	0	0	0
Bacteria	Proteobacteria	Deltaproteobacteria	Myxococcales	uncultured	uncultured bacterium	0	0	0	0	0	0	0	0.184528	0	0	0	0
Bacteria	Proteobacteria	Deltaproteobacteria	Myxococcales	Vulgatibacteraceae	Vulgatibacter	0	0	0	0	0	0	0	0	0	0.122089	0	0
Bacteria	Proteobacteria	Deltaproteobacteria	NB1-j	Ambiguous_taxa	Unclassified	0	0	0	0	0	0	0	0	0.361337	0	0	0
Bacteria	Proteobacteria	Deltaproteobacteria	NB1-j	Unclassified	Unclassified	1.71164	1.00188	0.165136	0	0	0.504256	0	0.581973	0.56208	0.76742	0	0
Bacteria	Proteobacteria	Deltaproteobacteria	NB1-j	uncultured deep-sea bacterium	Unclassified	0.12226	0	0	0	0	0	0	0	0	0	0	0
Bacteria	Proteobacteria	Deltaproteobacteria	NB1-j	uncultured delta proteobacterium	Unclassified	0.340582	0	0	0	0	0	0	0	0	0	0	0
Bacteria	Proteobacteria	Deltaproteobacteria	NB1-j	uncultured organism	Unclassified	0	0.400751	0	0	0	0	0	0	0	0	0	0
Bacteria	Proteobacteria	Deltaproteobacteria	NB1-j	uncultured soil bacterium	Unclassified	0	0	0	0	0	0	0.54231	0.298084	0.265984	0.89823	0	0
Bacteria	Proteobacteria	Deltaproteobacteria	Oligoflexales	0319-6G20	Unclassified	0	0	0	0	0	0	0	0.269695	0	0	0	0
Bacteria	Proteobacteria	Deltaproteobacteria	Oligoflexales	0319-6G20	uncultured delta proteobacterium	0	0	0	0	0	0	0.429755	0	0	0	0	0
Bacteria	Proteobacteria	Deltaproteobacteria	Oligoflexales	0319-6G20	uncultured soil bacterium	0	0	0	0	0	0	0.0818582	0	0	0	0	0
Bacteria	Proteobacteria	Deltaproteobacteria	Oligoflexales	Oligoflexaceae	Unclassified	0	0	0.185778	0	0	0	0	0.0425834	0	0	0	0
Bacteria	Proteobacteria	Deltaproteobacteria	Oligoflexales	Oligoflexaceae	uncultured bacterium	0	0.206637	0	0	0	0	0	0	0.17565	0	0	0
Bacteria	Proteobacteria	Deltaproteobacteria	Oligoflexales	Oligoflexaceae	uncultured proteobacterium	0	0.118973	0	0	0	0	0	0	0	0	0	0
Bacteria	Proteobacteria	Deltaproteobacteria	SAR324 clade(Marine group B)	Candidatus Nitrosoarchaeum limnia SFB1	Unclassified	0	0.100188	0	0	0	0	0	0	0	0	0	0
Bacteria	Proteobacteria	Deltaproteobacteria	SAR324 clade(Marine group B)	Unclassified	Unclassified	0.375513	0	0	0	0	0	0	0	0	0	0.16725	0
Bacteria	Proteobacteria	Deltaproteobacteria	SAR324 clade(Marine group B)	uncultured organism	Unclassified	0	0	0.165136	0.175039	0	0	0	0	0	0	0	0
Bacteria	Proteobacteria	Deltaproteobacteria	SAR324 clade(Marine group B)	uncultured proteobacterium	Unclassified	0.401712	0.413275	0	0.166287	0	0.141192	0	0	0	0	0	0
Bacteria	Proteobacteria	Deltaproteobacteria	Sva0485	Unclassified	Unclassified	0	0	0	0	0	0.786639	0	0	0	0	0	0
Bacteria	Proteobacteria	Deltaproteobacteria	Sva0485	uncultured delta proteobacterium	Unclassified	0	0	2.03323	0.253807	0.447313	0	0	0	0	0	0	0
Bacteria	Proteobacteria	Deltaproteobacteria	Syntrophobacterales	Syntrophaceae	Desulfomonile	0	0	1.10435	0	0.562336	0	0	0	0	0	0	0
Bacteria	Proteobacteria	Deltaproteobacteria	Syntrophobacterales	Syntrophaceae	uncultured	0	0	0	0	0	0	0	0	0.642377	0.0959274	0	0
Bacteria	Proteobacteria	Deltaproteobacteria	Unclassified	Unclassified	Unclassified	0	0	0.227062	0.428846	0.69014	0	0	0.234209	0.120446	0	0	0
Bacteria	Proteobacteria	Epsilonproteobacteria	Campylobacterales	Campylobacteraceae	Arcobacter	0.235787	0	0.939209	1.35656	2.12793	0.274315	0	0	0	0	0	0
Bacteria	Proteobacteria	Epsilonproteobacteria	Campylobacterales	Campylobacteraceae	Campylobacter	0	0	0	2.16174	0	0.0484086	0	0	0	0	0	0
Bacteria	Proteobacteria	Epsilonproteobacteria	Campylobacterales	Campylobacteraceae	Sulfurospirillum	0	0	0.278667	1.05024	0.268388	0.185566	0	0	0	0	0	0
Bacteria	Proteobacteria	Epsilonproteobacteria	Campylobacterales	Campylobacteraceae	Thiofractor	0	0	0	0.603886	0	0.16943	0	0	0	0	0	0
Bacteria	Proteobacteria	Epsilonproteobacteria	Campylobacterales	Helicobacteraceae	Sulfurimonas	0	0	1.09402	5.69753	4.82459	1.18198	0	0	0	0	0	0
Bacteria	Proteobacteria	Epsilonproteobacteria	Campylobacterales	Helicobacteraceae	Sulfurovum	0.462842	1.27113	0.846321	1.25153	1.27804	1.26669	0	0	0	0	0	0
Bacteria	Proteobacteria	Epsilonproteobacteria	Campylobacterales	Helicobacteraceae	Unclassified	0	0	0	0	0.453703	0	0	0	0	0	0	0
Bacteria	Proteobacteria	Gammaproteobacteria	1013-28-CG33	uncultured bacterium	Unclassified	0	0.281778	0	0	0	0	0.13302	0.184528	0	0.165693	0	0
Bacteria	Proteobacteria	Gammaproteobacteria	Acidiferrobacterales	Acidiferrobacteraceae	Sulfurifustis	0	0	0	0	0	0	2.86504	3.47055	4.59701	2.92143	0	0
Bacteria	Proteobacteria	Gammaproteobacteria	Acidiferrobacterales	Acidiferrobacteraceae	uncultured	0	0	0	0	0	0	0	0	0.125464	0.401151	0	0
Bacteria	Proteobacteria	Gammaproteobacteria	Acidithiobacillales	9M32	uncultured bacterium	0	0	0	0.551374	0	0	0	0	0	0	0	0
Bacteria	Proteobacteria	Gammaproteobacteria	Acidithiobacillales	Acidithiobacillaceae	Acidithiobacillus	0	0	0	0	0	0	0	0	0	0	4.19644	2.57442
Bacteria	Proteobacteria	Gammaproteobacteria	Acidithiobacillales	KCM-B-112	uncultured bacterium	0	0.425798	0	0	0	0	0	0	0	0	0	0
Bacteria	Proteobacteria	Gammaproteobacteria	Alteromonadales	Alteromonadaceae	Alishewanella	0	0.325611	0	0	0	0	0	0	0	0	0	0
Bacteria	Proteobacteria	Gammaproteobacteria	Alteromonadales	Alteromonadaceae	Alteromonas	0	0	0	0	0.460093	0	0	0	0	0	0	0
Bacteria	Proteobacteria	Gammaproteobacteria	Alteromonadales	Alteromonadaceae	Marinobacter	0	0.356919	0	0	0.504825	0	0	0	0	0	0	0
Bacteria	Proteobacteria	Gammaproteobacteria	Alteromonadales	Alteromonadaceae	Paraglaciecola	0	0	0	0	0.594287	0	0	0	0	0	0	0
Bacteria	Proteobacteria	Gammaproteobacteria	Alteromonadales	Colwelliaceae	Colwellia	1.03048	0.10645	0	0	0	0	0	0	0	0	0	0
Bacteria	Proteobacteria	Gammaproteobacteria	Alteromonadales	Colwelliaceae	Thalassotalea	0.829622	0.513463	0	0	1.35472	0	0	0	0	0	0	0
Bacteria	Proteobacteria	Gammaproteobacteria	Alteromonadales	Pseudoalteromonadaceae	uncultured	0.130993	0	0	0	0	0	0	0	0	0	0	0
Bacteria	Proteobacteria	Gammaproteobacteria	Arenicellales	Arenicellaceae	uncultured	0.681163	0.745147	13.3863	2.8794	6.54355	1.93634	0	0	0	0	0	0
Bacteria	Proteobacteria	Gammaproteobacteria	BD7-8 marine group	Ambiguous_taxa	Unclassified	0	0	0	0	0	0.266247	0	0	0	0	0	0
Bacteria	Proteobacteria	Gammaproteobacteria	BD7-8 marine group	Unclassified	Unclassified	0	0	0	0	0	0.415507	0	0	0	0	0	0
Bacteria	Proteobacteria	Gammaproteobacteria	BD7-8 marine group	uncultured bacterium	Unclassified	0.331849	0.544771	0	0	0	0	0	0	0	0	0	0
Bacteria	Proteobacteria	Gammaproteobacteria	Cellvibrionales	Cellvibrionaceae	Simiduia	0	0.601127	0	0	0.67736	0	0	0	0	0	0	0
Bacteria	Proteobacteria	Gammaproteobacteria	Cellvibrionales	Cellvibrionaceae	Unclassified	0.48904	0	0	0	0	0	0	0	0	0	0	0
Bacteria	Proteobacteria	Gammaproteobacteria	Cellvibrionales	Cellvibrionaceae	uncultured	0	0.381966	0	0	0	0	0	0	0	0	0	0
Bacteria	Proteobacteria	Gammaproteobacteria	Cellvibrionales	Halieaceae	Haliea	0.628766	0	0	0	0	0	0	0	0	0	0	0
Bacteria	Proteobacteria	Gammaproteobacteria	Cellvibrionales	Halieaceae	Halioglobus	0	0.889167	0	0	0	0	0	0	0	0	0	0
Bacteria	Proteobacteria	Gammaproteobacteria	Cellvibrionales	Halieaceae	Unclassified	0	0.18159	0	0	0	0	0	0	0	0	0	0
Bacteria	Proteobacteria	Gammaproteobacteria	Cellvibrionales	Porticoccaceae	Porticoccus	0	0.544771	0	0	0	0	0	0	0	0	0	0
Bacteria	Proteobacteria	Gammaproteobacteria	Cellvibrionales	Spongiibacteraceae	BD1-7 clade	0	0	0	0	0	0	0	0	0.190706	0	0	0
Bacteria	Proteobacteria	Gammaproteobacteria	Cellvibrionales	Spongiibacteraceae	Spongiibacter	0	0.488416	0	0	0	0	0	0	0	0	0	0
Bacteria	Proteobacteria	Gammaproteobacteria	Chromatiales	Chromatiaceae	Unclassified	0.541437	0	0	0	0	0	0	0	0	0	0	0
Bacteria	Proteobacteria	Gammaproteobacteria	Chromatiales	Chromatiaceae	uncultured	0	0.306825	0	0	0	0.141192	0	0	0	0	0	0
Bacteria	Proteobacteria	Gammaproteobacteria	Chromatiales	Ectothiorhodospiraceae	Thiogranum	0.73356	0.28804	0	0	0.383411	0.0726129	0	0.780696	0	0.64533	0	0
Bacteria	Proteobacteria	Gammaproteobacteria	Chromatiales	Ectothiorhodospiraceae	Unclassified	0.454109	1.13964	0.794716	0.297567	0.549556	0	0	0	0	0	0	0
Bacteria	Proteobacteria	Gammaproteobacteria	Chromatiales	Granulosicoccaceae	Granulosicoccus	1.30993	1.03319	0	0	0	0.556699	0	0	0	0	0	0
Bacteria	Proteobacteria	Gammaproteobacteria	Chromatiales	Halothiobacillaceae	Halothiobacillus	0	0	0.557333	1.3303	0.479264	0	0.296736	0.319375	0	0	0	0
Bacteria	Proteobacteria	Gammaproteobacteria	Chromatiales	Unclassified	Unclassified	0	0	0	0	0	0.536528	0	0	0	0	0	0
Bacteria	Proteobacteria	Gammaproteobacteria	Enterobacteriales	Enterobacteriaceae	Unclassified	0	0	0	0	0	0	0.112555	0	0	0	0.668998	0
Bacteria	Proteobacteria	Gammaproteobacteria	eub62A3	uncultured bacterium	Unclassified	0	0	0	0.262559	0	0	0	0	0	0	0	0
Bacteria	Proteobacteria	Gammaproteobacteria	Gammaproteobacteria Incertae Sedis	Unknown Family	Marinicella	0.218322	0	0	0	0	0	0	0	0	0	0	0
Bacteria	Proteobacteria	Gammaproteobacteria	Gammaproteobacteria Incertae Sedis	Unknown Family	Sedimenticola	0.497773	0.306825	0	1.60161	0	1.41192	0	0	0	0	0	0
Bacteria	Proteobacteria	Gammaproteobacteria	Gammaproteobacteria Incertae Sedis	Unknown Family	Thiohalophilus	1.32739	1.42768	0	0	0	0.665618	0	0	0	0	0	0
Bacteria	Proteobacteria	Gammaproteobacteria	Gammaproteobacteria Incertae Sedis	Unknown Family	Unclassified	0	0	0	0	0	0.306588	0	0	0	0	0	0
Bacteria	Proteobacteria	Gammaproteobacteria	Gammaproteobacteria Incertae Sedis	Unknown Family	uncultured	0	0.319349	0	0	0.204486	1.20618	0	0	0.215798	0	0	0
Bacteria	Proteobacteria	Gammaproteobacteria	HTA4	Unclassified	Unclassified	0	0	0.268346	0	0	0	0	0	0	0	0	0
Bacteria	Proteobacteria	Gammaproteobacteria	HTA4	uncultured bacterium	Unclassified	0	0	0	0.210047	0	0	0.3172	0.134847	0	0	0	0
Bacteria	Proteobacteria	Gammaproteobacteria	KI89A clade	Ambiguous_taxa	Unclassified	0	0.43206	0	0	0	0	0	0.347764	0.431597	0	0	0
Bacteria	Proteobacteria	Gammaproteobacteria	KI89A clade	Unclassified	Unclassified	0.73356	0.356919	0	0	0	0.500222	0	0.33357	0.311151	0	0	0
Bacteria	Proteobacteria	Gammaproteobacteria	KI89A clade	uncultured bacterium	Unclassified	0	0	0	0	0	0	0	0	0	0.549403	0	0
Bacteria	Proteobacteria	Gammaproteobacteria	Legionellales	Coxiellaceae	Aquicella	0	0	0	0	0	0	0	0.454223	0	0.139531	0	0
Bacteria	Proteobacteria	Gammaproteobacteria	Legionellales	Coxiellaceae	Coxiella	0	0	0	0.201295	0	0	0.736724	0	0	0	0	0
Bacteria	Proteobacteria	Gammaproteobacteria	Legionellales	Coxiellaceae	Rickettsiella	0	0	0	0.341327	0	0.367098	0	0	0	0	0	0
Bacteria	Proteobacteria	Gammaproteobacteria	Oceanospirillales	Alcanivoracaceae	Alcanivorax	0	0	0	0	0	0	0	0	0	0	0.273681	0
Bacteria	Proteobacteria	Gammaproteobacteria	Oceanospirillales	Alcanivoracaceae	Kangiella	0.593835	0.519724	0	0	0	0	0	0	0	0	0	0
Bacteria	Proteobacteria	Gammaproteobacteria	Oceanospirillales	CrystalBog021C3	uncultured bacterium	0	0	0	0	0.511215	0	0	0	0	0	0	0
Bacteria	Proteobacteria	Gammaproteobacteria	Oceanospirillales	Halomonadaceae	Halomonas	0	0.187852	0	0	0.792383	0	0	0	0	0	0	0
Bacteria	Proteobacteria	Gammaproteobacteria	Oceanospirillales	Oceanospirillaceae	Amphritea	0	0	0	0	0.0894626	0	0	0	0	0	0	0
Bacteria	Proteobacteria	Gammaproteobacteria	Oceanospirillales	Oceanospirillaceae	Marinobacterium	1.31866	0.594865	0	0	0	0	0	0	0	0	0	0
Bacteria	Proteobacteria	Gammaproteobacteria	Oceanospirillales	Oceanospirillaceae	Marinomonas	0	0	0	0	0.549556	0	0	0	0	0	0	0
Bacteria	Proteobacteria	Gammaproteobacteria	Oceanospirillales	Oceanospirillaceae	Oleibacter	0	0	0	0	0.428142	0	0	0	0	0	0	0
Bacteria	Proteobacteria	Gammaproteobacteria	Oceanospirillales	Oceanospirillaceae	Pseudohongiella	0.375513	0.563557	0	0	0	0	0	0	0	0	0	0
Bacteria	Proteobacteria	Gammaproteobacteria	Oceanospirillales	Oceanospirillaceae	Reinekea	0.148459	0	0	0	0	0	0	0	0	0	0	0
Bacteria	Proteobacteria	Gammaproteobacteria	Oceanospirillales	OM182 clade	Unclassified	0.628766	0.676268	0.20642	0	0	0	0	0	0	0	0	0
Bacteria	Proteobacteria	Gammaproteobacteria	Pseudomonadales	Moraxellaceae	Acinetobacter	0	0	0	0	0	0	0	0	0	0	1.42922	0
Bacteria	Proteobacteria	Gammaproteobacteria	Pseudomonadales	Pseudomonadaceae	Pseudomonas	0	0	0	0	0	0	0	0	1.10409	17.2408	1.0035	1.66264
Bacteria	Proteobacteria	Gammaproteobacteria	Salinisphaerales	Salinisphaeraceae	uncultured	0.532705	0.275517	0	0	0	0	0	0	0	0	0	0
Bacteria	Proteobacteria	Gammaproteobacteria	Sva0071	Ambiguous_taxa	Unclassified	0	0	0	0	0	0.125055	0	0	0	0	0	0
Bacteria	Proteobacteria	Gammaproteobacteria	Thiotrichales	Piscirickettsiaceae	endosymbionts	0.139726	0	0	0.315071	0.453703	0.552664	0	0	0	0	0	0
Bacteria	Proteobacteria	Gammaproteobacteria	Thiotrichales	Piscirickettsiaceae	Thiomicrospira	0	0	0	0.341327	0.268388	0.415507	0	0	0	0	0	0
Bacteria	Proteobacteria	Gammaproteobacteria	Thiotrichales	Piscirickettsiaceae	uncultured	0	0	0	0	0	0.173464	0	0	0	0	0	0
Bacteria	Proteobacteria	Gammaproteobacteria	Thiotrichales	Thiotrichaceae	Candidatus Marithrix	0	0	0	0.367583	0	0	0	0	0	0	0	0
Bacteria	Proteobacteria	Gammaproteobacteria	Thiotrichales	Thiotrichaceae	Candidatus Thiopilula	0	0	0	0	0	12.445	0	0	0	0	0	0
Bacteria	Proteobacteria	Gammaproteobacteria	Thiotrichales	Thiotrichaceae	Cocleimonas	1.85137	0.851597	0	0	0	0	0	0	0	0	0	0
Bacteria	Proteobacteria	Gammaproteobacteria	Thiotrichales	Thiotrichaceae	Methylohalomonas	0.67243	0.294302	0	0	0	0	0	0	0	0	0	0
Bacteria	Proteobacteria	Gammaproteobacteria	Thiotrichales	Thiotrichaceae	Thiothrix	0	0	0	0	0	0.153294	0	0	0	0	0	0
Bacteria	Proteobacteria	Gammaproteobacteria	Thiotrichales	Thiotrichaceae	Unclassified	0	0	0	0	0	0.395337	0	0	0	0	0	0
Bacteria	Proteobacteria	Gammaproteobacteria	Thiotrichales	Thiotrichaceae	uncultured	3.73766	3.05573	0	0.595134	1.38667	1.56118	0	0	0.567098	0	0	0
Bacteria	Proteobacteria	Gammaproteobacteria	Unclassified	Unclassified	Unclassified	3.65034	2.73012	3.00341	1.87292	1.07994	6.93856	0.890208	1.0291	0.170631	0	0	0
Bacteria	Proteobacteria	Gammaproteobacteria	uncultured	Ambiguous_taxa	Unclassified	0	0	0	0	0.217266	0	0	0	0	0	0	0
Bacteria	Proteobacteria	Gammaproteobacteria	uncultured	Unclassified	Unclassified	0.890752	1.1459	0.588296	0	0.581507	1.81936	0	0.276792	0	0	0	0
Bacteria	Proteobacteria	Gammaproteobacteria	uncultured	uncultured gamma proteobacterium	Unclassified	0.157192	0	0	0	0	0.112953	0	0	0	0	0	0
Bacteria	Proteobacteria	Gammaproteobacteria	uncultured bacterium	Unclassified	Unclassified	0	0	0	0.542622	0	0	0	0	0	0	0	0
Bacteria	Proteobacteria	Gammaproteobacteria	Vibrionales	Vibrionaceae	Vibrio	0	0	0	0	0.281168	0	0	0	0	0	0	0
Bacteria	Proteobacteria	Gammaproteobacteria	X35	Unclassified	Unclassified	0	0	0.877284	0.428846	0.268388	0	0	0	0	0	0	0
Bacteria	Proteobacteria	Gammaproteobacteria	Xanthomonadales	JTB255 marine benthic group	Ambiguous_taxa	0	0.28804	0	0	0	0.496188	0	0	0	0	0	0
Bacteria	Proteobacteria	Gammaproteobacteria	Xanthomonadales	JTB255 marine benthic group	Unclassified	2.4976	1.31497	0	0	0	0.601073	0	0	0	0	0	0
Bacteria	Proteobacteria	Gammaproteobacteria	Xanthomonadales	Nevskiaceae	Alkanibacter	0	0	0	0	0	0	0	0	0.28104	0	0	0
Bacteria	Proteobacteria	Gammaproteobacteria	Xanthomonadales	Solimonadaceae	Fontimonas	0	0.319349	0	0	0.428142	0.088749	0	0	0.336244	0	0	0
Bacteria	Proteobacteria	Gammaproteobacteria	Xanthomonadales	uncultured	Ambiguous_taxa	0	0	0	0	0	0	0	0	0.265984	0	0	0
Bacteria	Proteobacteria	Gammaproteobacteria	Xanthomonadales	uncultured	Unclassified	0	0	0	0	0	0	0	0.610362	1.04888	0.531961	0	0
Bacteria	Proteobacteria	Gammaproteobacteria	Xanthomonadales	Xanthomonadaceae	Dokdonella	0	0	0	0	0	0	0.337665	0	0	0	0	0
Bacteria	Proteobacteria	Gammaproteobacteria	Xanthomonadales	Xanthomonadaceae	Dyella	0	0	0	0	0	0	0	0	0.326207	0.200576	0	0
Bacteria	Proteobacteria	Gammaproteobacteria	Xanthomonadales	Xanthomonadaceae	Metallibacterium	0	0	0	0	0	0	0	0	0	0	0	3.0303
Bacteria	Proteobacteria	Gammaproteobacteria	Xanthomonadales	Xanthomonadaceae	Rhodanobacter	0	0	0	0	0.0319509	0	0	0	0	0	0	0
Bacteria	Proteobacteria	Gammaproteobacteria	Xanthomonadales	Xanthomonadaceae	Tahibacter	0	0	0	0	0	0	0.573007	0	0	0	0	0
Bacteria	Proteobacteria	Gammaproteobacteria	Xanthomonadales	Xanthomonadaceae	Unclassified	0	0	0.805037	0	0	0	0	0	0.411523	0	0	0
Bacteria	Proteobacteria	Gammaproteobacteria	Xanthomonadales	Xanthomonadaceae	uncultured	0	0	0	0	0	0	0	0.581973	0.511894	0	0	0
Bacteria	Proteobacteria	Gammaproteobacteria	Xanthomonadales	Xanthomonadales Incertae Sedis	Acidibacter	0	0	0	0	0	0	0	0	0	0	0	0.50952
Bacteria	Proteobacteria	Milano-WF1B-44	uncultured bacterium	Unclassified	Unclassified	1.23133	0.256731	0	0	0	0	0	0	0	0	0	0
Bacteria	Proteobacteria	pItb-vmat-80	uncultured bacterium	Unclassified	Unclassified	0	0	0	0	0	0.302554	0	0	0	0	0	0
Bacteria	Proteobacteria	Proteobacteria Incertae Sedis	Unknown Order	Unknown Family	Candidatus Tenderia	0	0	0	0	0.0958528	0	0	0	0	0	0	0
Bacteria	Proteobacteria	Proteobacteria Incertae Sedis	Unknown Order	Unknown Family	Candidatus Thiobios	1.75531	0.820288	1.672	3.15946	0.236437	1.47646	0	0	0	0	0	0
Bacteria	Proteobacteria	SPOTSOCT00m83	Unclassified	Unclassified	Unclassified	0.943149	0.400751	0	0	0	0	0	0	0	0	0	0
Bacteria	Proteobacteria	SPOTSOCT00m83	uncultured bacterium	Unclassified	Unclassified	0	0.814026	0	0	0	0	0	0	0	0	0	0
Bacteria	Proteobacteria	SPOTSOCT00m83	uncultured gamma proteobacterium	Unclassified	Unclassified	0	0.112711	0	0	0	0	0	0	0	0	0	0
Bacteria	Proteobacteria	Unclassified	Unclassified	Unclassified	Unclassified	4.92533	5.36005	0.412839	0.997724	0.0447313	2.40026	0	0.305181	0.341263	0	0.258477	0
Bacteria	RBG-1 (Zixibacteria)	Ambiguous_taxa	Unclassified	Unclassified	Unclassified	0	0	0	0	0	0	0	0	0.346281	0	0	0
Bacteria	RBG-1 (Zixibacteria)	candidate division Zixibacteria bacterium RBG-1	Unclassified	Unclassified	Unclassified	0	0	0	0	0	0	0	0	0.17565	0	0	0
Bacteria	RBG-1 (Zixibacteria)	Unclassified	Unclassified	Unclassified	Unclassified	0	0.0187852	1.94034	0.472606	0.396191	0	0.13302	0.149042	0	0	0	0
Bacteria	RBG-1 (Zixibacteria)	uncultured bacterium	Unclassified	Unclassified	Unclassified	0.751026	0.363181	3.37496	0.0787677	0.817944	0.217839	1.14601	0	0.10539	0	0	0
Bacteria	RBG-1 (Zixibacteria)	uncultured candidate division GN04 bacterium	Unclassified	Unclassified	Unclassified	0	0	0	0	0	0	0	0	0.376393	0	0	0
Bacteria	Saccharibacteria	Unclassified	Unclassified	Unclassified	Unclassified	0	0	0	0	0	0	0.0716259	0	0.0301114	0	0	0
Bacteria	Saccharibacteria	uncultured candidate division WS5 bacterium	Unclassified	Unclassified	Unclassified	0	0	0	0	0	0	0	0.0425834	0	0	0	0
Bacteria	Saccharibacteria	uncultured Candidatus Saccharibacteria bacterium	Unclassified	Unclassified	Unclassified	0	0	0	0	0	0	0	0	0	0.0174414	0	0
Bacteria	SBR1093	Unclassified	Unclassified	Unclassified	Unclassified	0	0	0	0	0	0	0	0.418737	0	0.444755	0	0
Bacteria	SBR1093	uncultured bacterium	Unclassified	Unclassified	Unclassified	0.323116	0.219161	0	0	0	0	0	0.220014	0.341263	0	0	0
Bacteria	Spirochaetae	Spirochaetes	Spirochaetales	Brevinemataceae	Brevinema	0	0	0.237383	0.595134	0.127804	0	0	0	0	0	0	0
Bacteria	Spirochaetae	Spirochaetes	Spirochaetales	Leptospiraceae	Turneriella	0	0	0	0.148783	0	0	0	0	0	0	0	0
Bacteria	Spirochaetae	Spirochaetes	Spirochaetales	PL-11B10	uncultured organism	0	0	0	0.297567	0	0	0	0	0	0	0	0
Bacteria	Spirochaetae	Spirochaetes	Spirochaetales	Spirochaetaceae	Salinispira	0	0	0.216741	0.288815	0.325899	0	0	0	0	0	0	0
Bacteria	Spirochaetae	Spirochaetes	Spirochaetales	Spirochaetaceae	Spirochaeta 2	0.0873286	0.156544	1.58943	1.06774	2.12793	0.709992	0	0	0	0	0.380113	0
Bacteria	Spirochaetae	Spirochaetes	Spirochaetales	Spirochaetaceae	Unclassified	0	0	0	0	1.14384	0	0	0	0	0	0	0
Bacteria	Spirochaetae	Spirochaetes	Spirochaetales	Unclassified	Unclassified	0	0	0	0	0.102243	0	0	0	0	0	0	0
Bacteria	Spirochaetae	Spirochaetes	Spirochaetales	V2072-189E03	Unclassified	0	0	0	0.166287	0	0	0	0	0	0	0	0
Bacteria	SR1 (Absconditabacteria)	uncultured candidate division SR1 bacterium	Unclassified	Unclassified	Unclassified	0	0	0	0.227551	0	0	0	0	0	0	0	0
Bacteria	SR1 (Absconditabacteria)	uncultured organism	Unclassified	Unclassified	Unclassified	0	0	0	0.350079	0	0.0443745	0	0	0	0	0	0
Bacteria	Tectomicrobia	uncultured bacterium	Unclassified	Unclassified	Unclassified	0.419177	0.325611	0	0	0	0	0	0.170334	0	0	0	0
Bacteria	Tenericutes	Mollicutes	NB1-n	Unclassified	Unclassified	0	0	0	0	0.300339	0	0	0	0	0	0	0
Bacteria	Tenericutes	Mollicutes	NB1-n	uncultured bacterium	Unclassified	0	0	0	0	0.127804	0	0	0	0	0	0	0
Bacteria	Tenericutes	Mollicutes	NB1-n	uncultured Firmicutes bacterium	Unclassified	0	0	0	0	0.555946	0	0	0	0	0	0	0
Bacteria	Tenericutes	Mollicutes	NB1-n	uncultured organism	Unclassified	0	0	0	0	0.773212	0	0	0	0	0	0	0
Bacteria	Thermotogae	Thermotogae	Petrotogales	Petrotogaceae	Unclassified	0	0	0	0	0	0.0484086	0	0	0	0	0	0
Bacteria	TM6 (Dependentiae)	Unclassified	Unclassified	Unclassified	Unclassified	0	0.262993	0	0.201295	0.536776	0.350962	0	0	0	0	0	0
Bacteria	TM6 (Dependentiae)	uncultured bacterium	Unclassified	Unclassified	Unclassified	0.235787	0	0.185778	0.411343	0	0	0.235342	0	0	0	0	0.911773
Bacteria	TM6 (Dependentiae)	uncultured Candidatus Dependentiae bacterium	Unclassified	Unclassified	Unclassified	0	0	0	0	0	0	0	0	0	0	0.653794	1.12631
Bacteria	TM6 (Dependentiae)	uncultured organism	Unclassified	Unclassified	Unclassified	0	0	0	0	0	0	0	0	0	0.313944	0	0
Bacteria	TM6 (Dependentiae)	uncultured prokaryote	Unclassified	Unclassified	Unclassified	0.0698629	0	0	0	0	0	0	0	0	0	0	0
Bacteria	TM6 (Dependentiae)	uncultured soil bacterium	Unclassified	Unclassified	Unclassified	0	0	0	0	0	0	0	0.163236	0.28104	0	0	0
Bacteria	Unclassified	Unclassified	Unclassified	Unclassified	Unclassified	0.707362	1.72198	4.09743	3.06319	2.13432	2.39219	4.69661	4.04542	1.85687	2.08424	1.87015	7.10646
Bacteria	Verrucomicrobia	LD1-PB3	uncultured bacterium	Unclassified	Unclassified	0	0	0	0.175039	0	0	0	0	0	0	0	0
Bacteria	Verrucomicrobia	MSBL3	uncultured bacterium	Unclassified	Unclassified	0	0	0	0	0	0.157328	0	0	0	0	0	0
Bacteria	Verrucomicrobia	OPB35 soil group	Unclassified	Unclassified	Unclassified	0.0960615	0.0751409	0	0	0	0	1.53484	0.738112	0.908361	1.15113	0.228068	0
Bacteria	Verrucomicrobia	OPB35 soil group	uncultured bacterium	Unclassified	Unclassified	0	0	0	0	0	0	0	0.33357	0.306133	0	0	0
Bacteria	Verrucomicrobia	OPB35 soil group	uncultured Verrucomicrobia bacterium	Unclassified	Unclassified	0	0	0	0	0.0447313	0	0	0.170334	0	0	0	0
Bacteria	Verrucomicrobia	Opitutae	Opitutales	Opitutaceae	Diplosphaera	0	0	0	0	0.0766822	0	0	0	0	0	0	0
Bacteria	Verrucomicrobia	Opitutae	Opitutales	Opitutaceae	Opitutus	0	0	0	0	0	0	1.20741	0.326473	0	0.436034	0	0
Bacteria	Verrucomicrobia	Opitutae	Puniceicoccales	Puniceicoccaceae	Lentimonas	0	0.219161	0	0	0	0	0	0	0	0	0	0
Bacteria	Verrucomicrobia	Opitutae	Puniceicoccales	Puniceicoccaceae	uncultured	0	0	0	0	0.0894626	0	0	0	0	0	0	0
Bacteria	Verrucomicrobia	R76-B128	Unclassified	Unclassified	Unclassified	0	0	0	0	0.466483	0	0	0	0	0	0	0
Bacteria	Verrucomicrobia	R76-B128	uncultured bacterium	Unclassified	Unclassified	0	0	0	0	1.71257	0	0	0	0	0	0	0
Bacteria	Verrucomicrobia	Spartobacteria	Chthoniobacterales	Chthoniobacteraceae	Chthoniobacter	0	0	0	0	0	0	0.419523	0.191625	0.361337	0	0	0
Bacteria	Verrucomicrobia	Spartobacteria	Chthoniobacterales	Chthoniobacterales Incertae Sedis	Terrimicrobium	0	0	0	0	0	0	0.511614	0.319375	0.356318	0.784861	0	0
Bacteria	Verrucomicrobia	Spartobacteria	Chthoniobacterales	DA101 soil group	Unclassified	0	0	0	0	0	0	0.368362	0.567779	0	0.575565	0	0
Bacteria	Verrucomicrobia	Unclassified	Unclassified	Unclassified	Unclassified	0	0	0	0	0	0	0	0.0851668	0	0	0	0
Bacteria	Verrucomicrobia	uncultured bacterium	Unclassified	Unclassified	Unclassified	0	0	0	0	0.185315	0	0	0	0	0	0	0
Bacteria	Verrucomicrobia	Verrucomicrobia Incertae Sedis	Unknown Order	Unknown Family	Candidatus Methylacidiphilum	0	0	0	0	0	0	0	0	0.0652414	0	0	0
Bacteria	Verrucomicrobia	Verrucomicrobiae	Verrucomicrobiales	DEV007	Ambiguous_taxa	0	0.475892	0	0	0	0	0	0	0	0	0	0
Bacteria	Verrucomicrobia	Verrucomicrobiae	Verrucomicrobiales	DEV007	Unclassified	0.174657	0.237946	0	0	0	0	0	0	0	0	0	0
Bacteria	Verrucomicrobia	Verrucomicrobiae	Verrucomicrobiales	Verrucomicrobiaceae	Prosthecobacter	0	0	0	0	0	0	0.552543	0	0	0.270341	0	0
Bacteria	Verrucomicrobia	Verrucomicrobiae	Verrucomicrobiales	Verrucomicrobiaceae	uncultured	0	0	0	0	0	0	0.296736	0	0.225836	0	0	0
Bacteria	Verrucomicrobia	WCHB1-41	Unclassified	Unclassified	Unclassified	0	0	0	0	0.255607	0	0	0.0354862	0.125464	0	0	0
Bacteria	Verrucomicrobia	WCHB1-41	uncultured organism	Unclassified	Unclassified	0	0	0	0	0	0.306588	0	0	0	0	0	0
Bacteria	Verrucomicrobia	WCHB1-41	uncultured Verrucomicrobia bacterium	Unclassified	Unclassified	0.12226	0.112711	0	0.498862	0	0	0	0	0	0	0	0
Bacteria	WA-aaa01f12	uncultured organism	Unclassified	Unclassified	Unclassified	0	0	0	0	0.0255607	0	0	0	0	0	0	0
Bacteria	WS1	uncultured bacterium	Unclassified	Unclassified	Unclassified	0	0	0	0	0	0.0645448	0	0	0	0	0	0
Unassigned	Unclassified	Unclassified	Unclassified	Unclassified	Unclassified	0	0	0.908246	1.27779	0.33868	0.419541	0	0.447126	0.180668	0.0610447	0	0
